# Supplementary material
Source: PubMed Central journal article supplement (PMC4407228)
Supplement: AEM.03560-14_zam999116238so1.pdf [file AEM.03560-14_zam999116238so1.pdf]

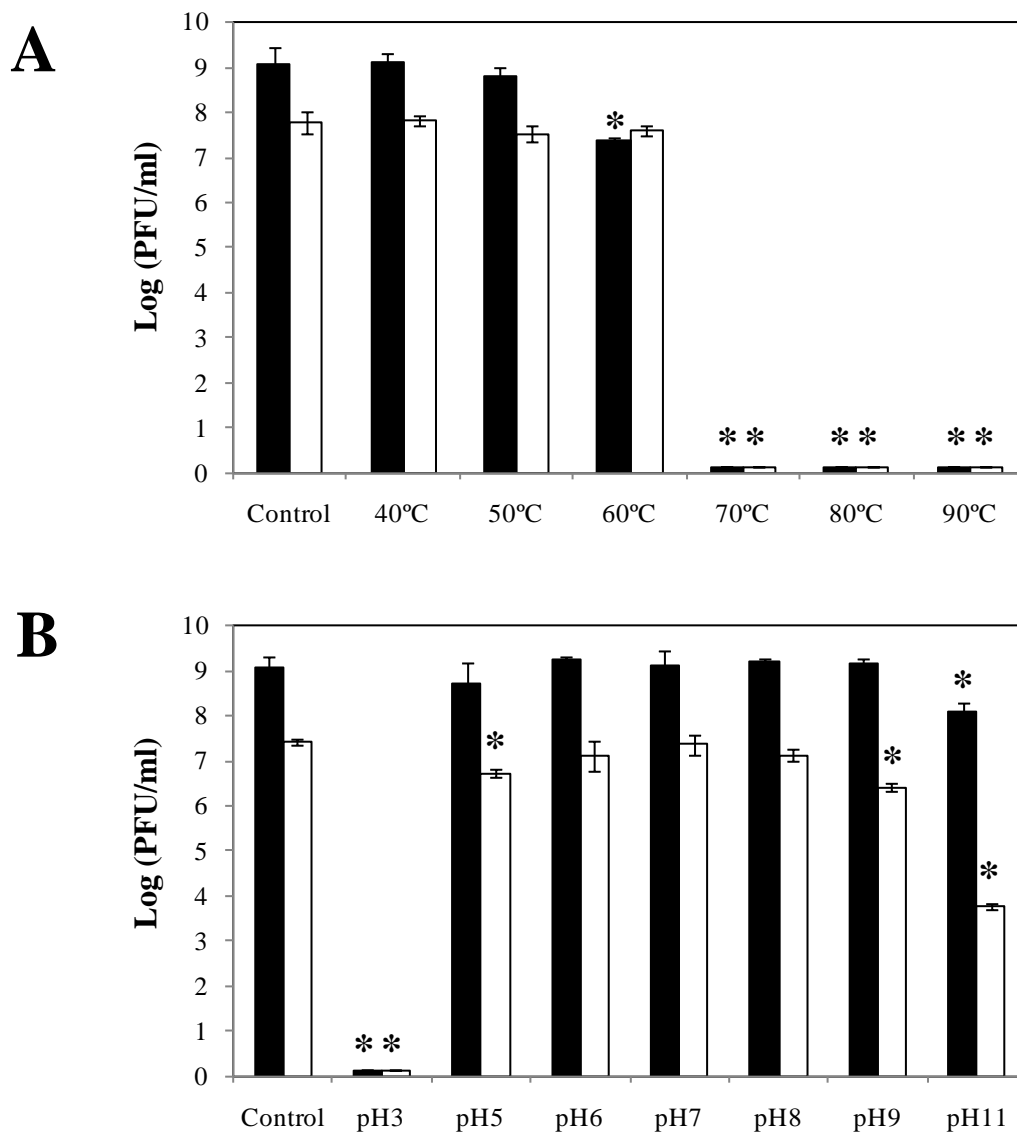

**Figure S1.** Phage sensitivity to environmental conditions. (A) Temperature and (B) pH, of phages phiIPLA-RODI (black) and phiIPLA-C1C (white). Values represent the mean  $\pm$  standard deviation of three independent experiments. Bars having an asterisk are significantly different from the control (ANOVA;  $P < 0.05$ ).

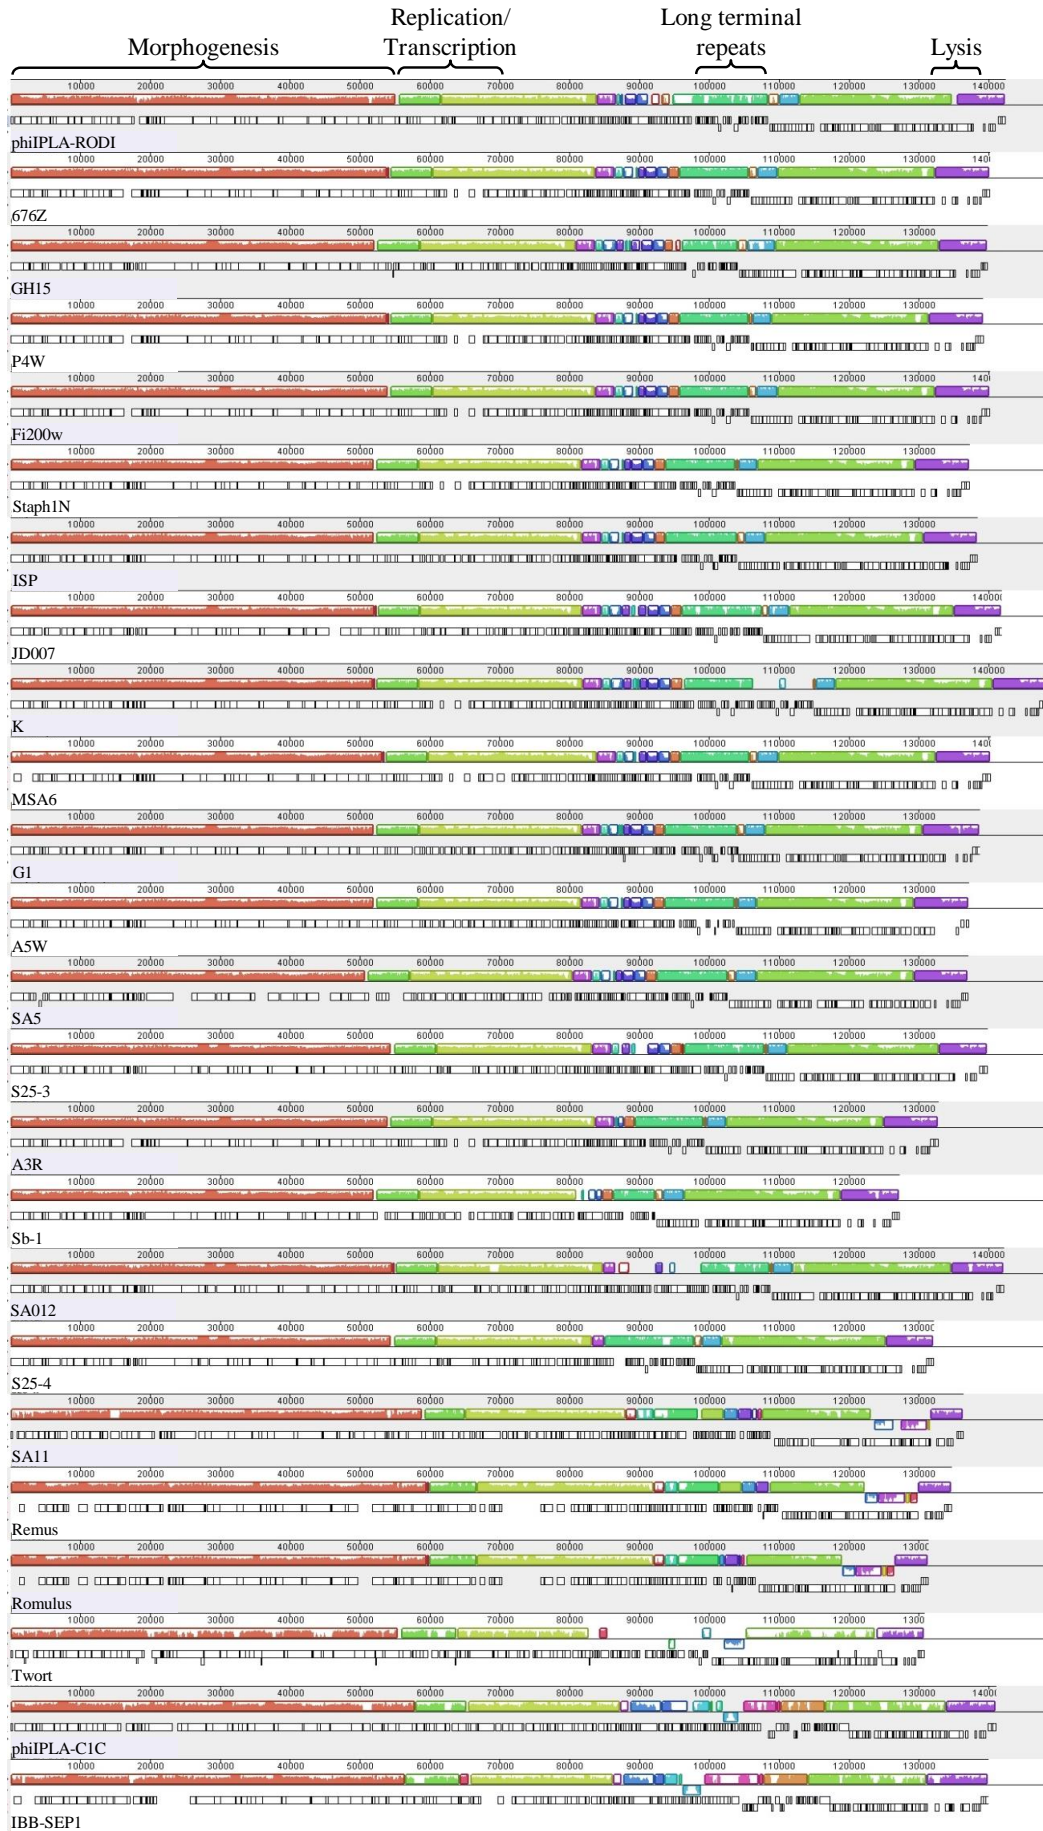

**Figure S2:** Progressive MAUVE comparison at the nucleotide level of phages belonging to the *Myoviridae* family infecting Staphylococcal species. Coloured blocks surround a region of the genome sequence that aligns and is homologous to part of another genome. Regions with lack of homology are outside these blocks or white inside the blocks. The height of the similarity profile corresponds to the average of conservation in that region of the genome sequence.

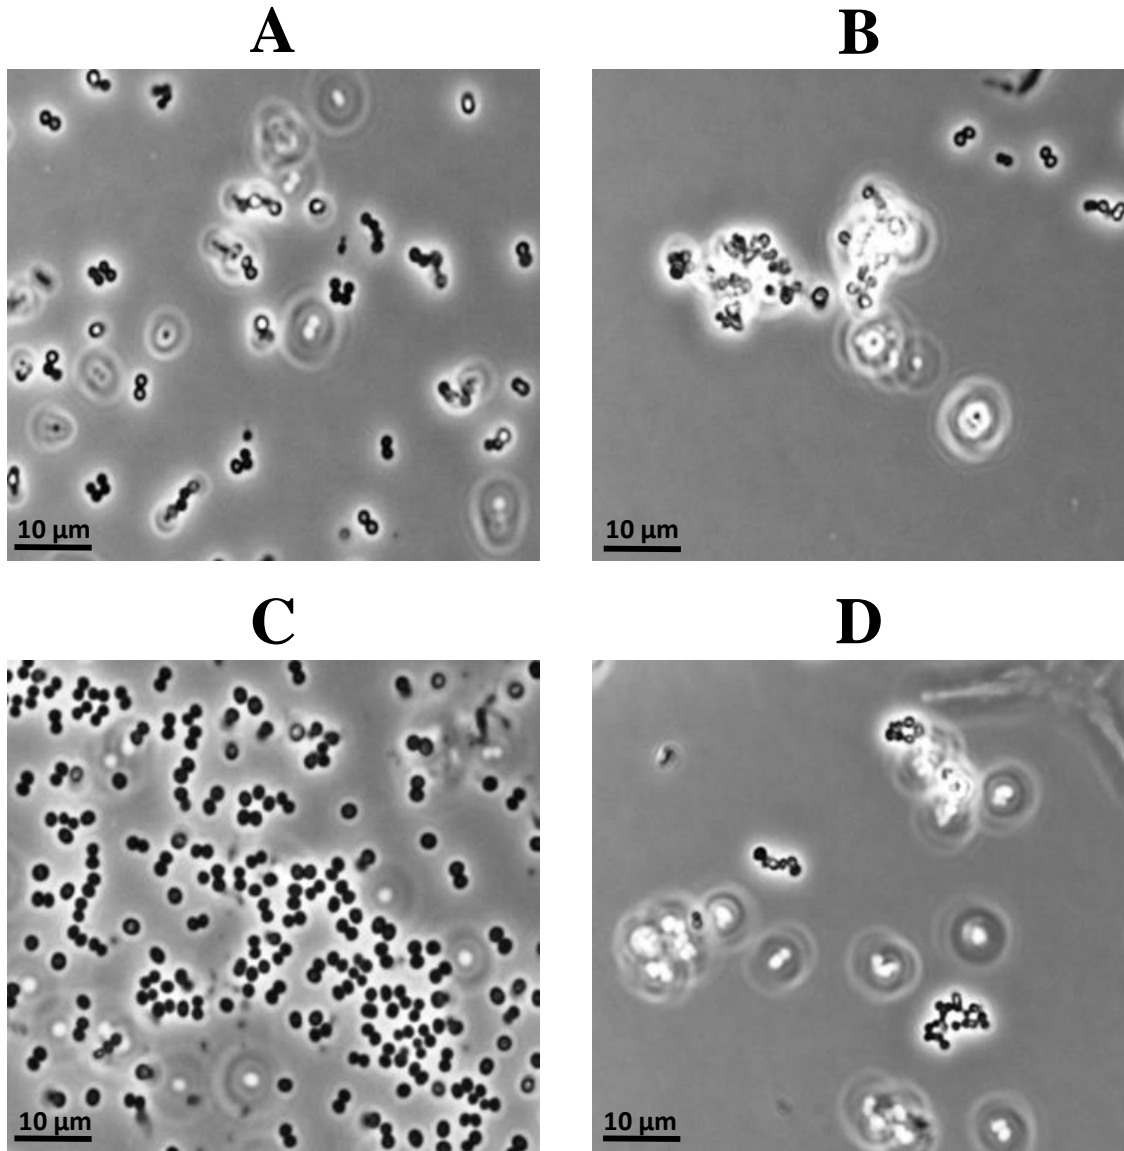

**Figure S3.** Optical microphotographs of (A) *S. aureus* IPLA16; (B) *S. aureus* IPLA16-R71 resistant to phage phiIPLA-RODI; (C) *S. epidermidis* LO5081 and (D) *S. epidermidis* LO5081-R49 resistant to phage phiIPLA-C1C. Cultures were grown in TSB at 37°C with shaking during 16 h.

| <i>orf</i> | From | To   | Length | aa  | kDa (pI)      | Predictive Function                  | Closes hit (E value)                                                            | % aa identity / % similarity | Accession no.  | Predicted domain (E value)            |
|------------|------|------|--------|-----|---------------|--------------------------------------|---------------------------------------------------------------------------------|------------------------------|----------------|---------------------------------------|
| 1          | 14   | 496  | 483    | 160 | 18.25 (3.60)  | Terminal repeat-encoded protein      | Terminal repeat-encoded protein [ <i>Staphylococcus</i> phage phiSA012] (1e-66) | 71% (83%)                    | BAO47048.1     |                                       |
| 2          | 575  | 739  | 165    | 54  | 6.3 (4.96)    | Terminal repeat-encoded protein      | Hypothetical protein [ <i>Staphylococcus</i> phage S25-4] (7e-28)               | 98% (98%)                    | YP_008853972.1 |                                       |
| 3          | 739  | 1008 | 270    | 89  | 10.1 (5.12)   | TreT                                 | Hypothetical protein GH15_015 [ <i>Staphylococcus</i> phage GH15] (1e-50)       | 93% (96%)                    | YP_007002138.1 |                                       |
| 4          | 1093 | 1314 | 222    | 73  | 8.65 (4.51)   | TreU                                 | Hypothetical protein [ <i>Staphylococcus</i> phage S25-4] (3e-37)               | 90% (93%)                    | YP_008853974.1 |                                       |
| 5          | 1932 | 1642 | 291    | 96  | 11.59 (4.27)  | Hypothetical protein                 | Hypothetical protein [ <i>Staphylococcus</i> phage JD007] (3e-62)               | 99% (98%)                    | YP_007112845.1 |                                       |
| 6          | 2272 | 2036 | 237    | 78  | 9.55 (4.59)   | BofL                                 | gp ORF004 [ <i>Staphylococcus</i> phage A5W] (4e-49)                            | 100% (100%)                  | ACB88995.1     |                                       |
| 7          | 2759 | 2274 | 486    | 161 | 19.16 (7.44)  | Hypothetical protein                 | ORF088 [ <i>Staphylococcus</i> phage G1] (8e-105)                               | 96% (97%)                    | YP_241045.1    |                                       |
| 8          | 3179 | 2772 | 408    | 135 | 16.46 (5.06)  | Hypothetical protein                 | ORF109 [ <i>Staphylococcus</i> phage G1] (4e-93)                                | 100% (100%)                  | YP_241046.1    |                                       |
| 9          | 3610 | 3179 | 432    | 143 | 17.24 (4.33)  | UboA                                 | UboA [ <i>Staphylococcus</i> phage Fi200W] (8e-95)                              | 100% (100%)                  | AFN38459.1     |                                       |
| 10         | 3804 | 3613 | 192    | 63  | 7.88 (10.21)  | Hypothetical protein                 | Hypothetical protein [ <i>Staphylococcus</i> phage JD007] (4e-36)               | 100% (100%)                  | YP_007112842.1 |                                       |
| 11         | 4286 | 3801 | 486    | 161 | 18.41 (9.6)   | Membrane protein                     | Membrane protein [ <i>Staphylococcus</i> phage phiSA012] (5e-105)               | 98% (99%)                    | BAO47055.1     |                                       |
| 12         | 4710 | 4279 | 432    | 143 | 167.44 (3.95) | Hypothetical protein                 | Hypothetical protein KgORF2 [ <i>Staphylococcus</i> phage K] (5e-97)            | 99% (100%)                   | YP_024433.1    |                                       |
| 13         | 5266 | 4724 | 543    | 180 | 21.55 (9.68)  | Nucleotidyl transferase              | Hypothetical protein KgORF3 [ <i>Staphylococcus</i> phage K] (5e-123)           | 99% (99%)                    | YP_024434.1    | COG1665 (9.88e-03)                    |
| 14         | 5766 | 5278 | 489    | 162 | 19.5 (9.89)   | ribA/ribD-fused hypothetical protein | Hypothetical protein KgORF4 [ <i>Staphylococcus</i> phage K] (4e-115)           | 98% (100%)                   | YP_024435.1    | ribofla_fusion[TIGR02464], (4.99e-75) |
| 15         | 6177 | 5779 | 399    | 132 | 16.75 (9.4)   | Hypothetical protein                 | Hypothetical protein [ <i>Staphylococcus</i> phage S25-3] (5e-87)               | 99% (99%)                    | YP_008854162.1 |                                       |
| 16         | 6881 | 6174 | 708    | 235 | 27.62 (4.88)  | Phosphatase                          | Putative protein phosphatase [ <i>Staphylococcus</i> phage K] (9e-169)          | 98% (100%)                   | YP_024437.1    | MPP_PPP_family[cd00144] (9.50e-27)    |
| 17         | 7535 | 6981 | 555    | 184 | 21.22 (4.33)  | Hypothetical protein                 | Hypothetical protein KgORF7 [ <i>Staphylococcus</i> phage K] (1e128)            | 99% (99%)                    | YP_024438.1    |                                       |
| 18         | 7868 | 7551 | 318    | 105 | 11.80 (7.19)  | Hypothetical protein                 | ORF138 [ <i>Staphylococcus</i> phage G1] (4e-66)                                | 99% (100%)                   | YP_241056.1    |                                       |
| 19         | 9402 | 8854 | 549    | 182 | 21.95 (4.25)  | Hypothetical protein                 | Hypothetical protein KgORF8 [ <i>Staphylococcus</i> phage K] (6e-123)           | 99% (100%)                   | YP_024439.1    |                                       |

|    |       |       |      |     |              |                            |                                                                            |             |                |                                    |
|----|-------|-------|------|-----|--------------|----------------------------|----------------------------------------------------------------------------|-------------|----------------|------------------------------------|
| 20 | 9624  | 9406  | 219  | 72  | 8.41 (4.18)  | Hypothetical protein       | ORF201 [ <i>Staphylococcus</i> phage G1] (3e-43)                           | 100% (100%) | YP_241058.1    |                                    |
| 21 | 9819  | 9625  | 195  | 64  | 7.64 (4.39)  | Hypothetical protein       | ORF218 [ <i>Staphylococcus</i> phage G1] (1e-37)                           | 100% (100%) | YP_241059.1    |                                    |
| 22 | 10546 | 9809  | 738  | 245 | 28.67 (5.98) | Hypothetical protein       | Hypothetical protein [ <i>Staphylococcus</i> phage JD007] (1e-171)         | 99% (99%)   | YP_007112830.1 |                                    |
| 23 | 10713 | 10609 | 105  | 34  | 4.13 (4.37)  | Hypothetical protein       | ORF437 [ <i>Staphylococcus</i> phage G1] (7e-12)                           | 85% (97%)   | YP_241061.1    |                                    |
| 24 | 10962 | 10735 | 228  | 75  | 89.2 (4.31)  | Aspartate aminotransferase | Hypothetical protein [ <i>Staphylococcus</i> phage S25-4] (3e-45)          | 97% (97%)   | YP_008853991.1 | PRK05937[PRK05937], (3.65e-03)     |
| 25 | 11350 | 10964 | 387  | 128 | 14.62 (4.57) | Hypothetical protein       | Hypothetical protein GH15_039 [ <i>Staphylococcus</i> phage GH15] (6e-89)  | 100% (100%) | YP_007002162.1 |                                    |
| 26 | 11620 | 11447 | 174  | 57  | 6.81 (4.94)  | Hypothetical protein       | Hypothetical protein GH15_040 [ <i>Staphylococcus</i> phage GH15] (8e-34)  | 100% (100%) | YP_007002163.1 |                                    |
| 27 | 12143 | 11661 | 483  | 160 | 18.98 (4.52) | Hypothetical protein       | Hypothetical protein [ <i>Staphylococcus</i> phage S25-4] (8e-108)         | 98% (100%)  | YP_008853994.1 |                                    |
| 28 | 12735 | 12193 | 543  | 180 | 20.55 (4.60) | Hypothetical protein       | Hypothetical protein GH15_042 [ <i>Staphylococcus</i> phage GH15] (1e-114) | 94% (96%)   | YP_007002165.1 |                                    |
| 29 | 13265 | 12735 | 531  | 176 | 20.51 (3.92) | Hypothetical protein       | Hypothetical protein GH15_043 [ <i>Staphylococcus</i> phage GH15] (7e-122) | 99% (100%)  | YP_007002166.1 |                                    |
| 30 | 13432 | 13268 | 165  | 54  | 6.15 (9.9)   | Membrane protein           | ORF256 [ <i>Staphylococcus</i> phage G1] (1e-26)                           | 94% (98%)   | YP_241068.1    |                                    |
| 31 | 13722 | 13435 | 288  | 95  | 11.29 (9.45) | Membrane protein           | Membrane protein [ <i>Staphylococcus</i> phage JD007] (2e-06)              | 52% (69%)   | YP_007112822.1 |                                    |
| 32 | 14567 | 13722 | 846  | 281 | 31.77 (4.41) | Hypothetical protein       | Hypothetical protein GH15_046 [ <i>Staphylococcus</i> phage GH15] (0.0)    | 98% (99%)   | YP_007002169.1 |                                    |
| 33 | 15698 | 14580 | 1119 | 372 | 42.24 (4.48) | AAA family ATPase          | Hypothetical protein [ <i>Staphylococcus</i> phage S25-4] (0.0)            | 99% (99%)   | YP_008854000.1 | PHA02244 ATPase-like protein (0.0) |
| 34 | 16177 | 15851 | 327  | 108 | 12.81 (4.52) | Hypothetical protein       | Hypothetical protein [ <i>Staphylococcus</i> phage S25-4] (9e-71)          | 97% (98%)   | YP_008854001.1 |                                    |
| 35 | 16586 | 16170 | 417  | 138 | 16.01 (5.21) | Hypothetical protein       | Hypothetical protein GH15_049 [ <i>Staphylococcus</i> phage GH15] (8e-94)  | 99% (99%)   | YP_007002172.1 |                                    |
| 36 | 17020 | 16718 | 303  | 100 | 11.30 (4.58) | NTP-PPase                  | Hypothetical protein KgORF17 [ <i>Staphylococcus</i> phage K] 87e-64)      | 100% (100%) | YP_024448.1    | NTP-PPase_u3[cd11540], (1.92e-24)  |
| 37 | 17208 | 17020 | 189  | 62  | 7.321 (4.04) | Hypothetical protein       | Hypothetical protein GH15_051 [ <i>Staphylococcus</i> phage GH15] (2e-34)  | 100% (100%) | YP_007002174.1 |                                    |
| 38 | 17413 | 17252 | 162  | 53  | 6.37 (4.39)  | Hypothetical protein       | ORF259 [ <i>Staphylococcus</i> phage G1] (3e-29)                           | 100% (100%) | YP_241076.1    |                                    |
| 39 | 19464 | 17413 | 2052 | 683 | 79.79 (6.52) | Hypothetical protein       | Hypothetical protein GH15_053 [ <i>Staphylococcus</i> phage GH15] (0.0)    | 99% (99%)   | YP_007002176.1 |                                    |
| 40 | 19806 | 19543 | 264  | 87  | 10.26 (4.97) | Hypothetical protein       | Hypothetical protein [ <i>Staphylococcus</i> phage S25-4] (2e-52)          | 98% (97%)   | YP_008854007.1 |                                    |
| 41 | 19996 | 19823 | 174  | 57  | 6.67 (7.15)  | Peptidoglycan binding      | Hypothetical protein [ <i>Staphylococcus</i> phage                         | 98% (100%)  | YP_007112812.1 | LysM[cd00118], (1.06e-07)          |

|    |       |       |      |     |              |                                      |                                                                             |             |                |                                                                                                                            |
|----|-------|-------|------|-----|--------------|--------------------------------------|-----------------------------------------------------------------------------|-------------|----------------|----------------------------------------------------------------------------------------------------------------------------|
|    |       |       |      |     |              | protein                              | JD007] (4e-31)                                                              |             |                |                                                                                                                            |
| 42 | 20581 | 20003 | 579  | 192 | 21.46 (8.93) | Hypothetical protein                 | Hypothetical protein [ <i>Staphylococcus</i> phage S25-4] (4e-130)          | 100% (100%) | YP_008854009.1 |                                                                                                                            |
| 43 | 21173 | 20574 | 600  | 199 | 22.58 (4.65) | Nucleoside 2-deoxyribosyltransferase | Hypothetical protein [ <i>Staphylococcus</i> phage S25-4] (2e-114)          | 82% (89%)   | YP_008854010.1 | Nuc_deoxyrib_tr[ <i>pfam05014</i> ], (3.71e-03)                                                                            |
| 44 | 22059 | 21166 | 894  | 297 | 34.55 (5)    | RNA ligase                           | Putative DNA ligase [ <i>Staphylococcus</i> phage GH15] (0.0)               | 95% (99%)   | YP_007002182.1 | RNA_ligase[ <i>pfam09414</i> ], (1.06e-11)                                                                                 |
| 45 | 22287 | 22063 | 225  | 74  | 8.15 (9.42)  | Hypothetical protein                 | Hypothetical protein [ <i>Staphylococcus</i> phage S25-4] (6e-40)           | 100% (100%) | YP_008854012.1 |                                                                                                                            |
| 46 | 23096 | 22356 | 741  | 246 | 28.53 (4.96) | PhoH-related protein                 | Putative PhoH-related protein [ <i>Staphylococcus</i> phage K] (0.0)        | 99% (100%)  | YP_024453.1    | PhoH[ <i>pfam02562</i> ], (5.49e-25)                                                                                       |
| 47 | 23762 | 23148 | 615  | 204 | 23.08 (3.97) | Hypothetical protein                 | Hypothetical protein [ <i>Staphylococcus</i> phage S25-4] (1e-142)          | 99% (99%)   | YP_008854014.1 |                                                                                                                            |
| 48 | 24203 | 23778 | 426  | 141 | 15.79 (7.15) | Ribonuclease                         | Putative ribonuclease [ <i>Staphylococcus</i> phage GH15] (2e-194)          | 100% (100%) | YP_007002186.1 |                                                                                                                            |
| 49 | 24384 | 24193 | 192  | 63  | 7.47 (5.61)  | Hypothetical protein                 | ORF222 [ <i>Staphylococcus</i> phage G1] (3e-37)                            | 100% (100%) | YP_241086.1    |                                                                                                                            |
| 50 | 25048 | 24407 | 642  | 213 | 24.58 (3.82) | Hypothetical protein                 | Hypothetical protein KgORF25 [ <i>Staphylococcus</i> phage K] (4e-143)      | 99% (100%)  | YP_024456.1    |                                                                                                                            |
| 51 | 25268 | 25038 | 231  | 76  | 8.83 (9.12)  | DNA binding protein                  | ORF187 [ <i>Staphylococcus</i> phage G1] (1e-46)                            | 100% (100%) | YP_241088.1    | HTH_XRE[ <i>cd00093</i> ], (3.67e-10)                                                                                      |
| 52 | 25498 | 25271 | 228  | 75  | 9.26 (10.21) | Hypothetical protein                 | ORF190 [ <i>Staphylococcus</i> phage G1] (2e-42)                            | 96% (98%)   | YP_241089.1    |                                                                                                                            |
| 53 | 26299 | 25607 | 693  | 230 | 24.90 (4.75) | Transglycosylase                     | Putative transglycosylase IsaA [ <i>Staphylococcus</i> phage GH15] (4e-167) | 100% (100%) | YP_007002191.1 | LT_GEWL[ <i>cd00254</i> ], (3.26e-5)                                                                                       |
| 54 | 27291 | 26497 | 795  | 264 | 29.29 (9.28) | Membrane protein                     | Putative membrane protein [ <i>Staphylococcus</i> phage GH15] (0.0)         | 100% (100%) | YP_007002192.1 |                                                                                                                            |
| 55 | 27599 | 27291 | 309  | 102 | 12.13 (9.31) | Hypothetical protein                 | Hypothetical protein GH15_070 [ <i>Staphylococcus</i> phage GH15] (6e-65)   | 100% (100%) | YP_007002193.1 |                                                                                                                            |
| 56 | 28332 | 27712 | 621  | 206 | 24.55 (9.41) | Hypothetical protein                 | Hypothetical protein KgORF27 [ <i>Staphylococcus</i> phage K] (9e-42)       | 42% (58%)   | YP_024458.1    |                                                                                                                            |
| 57 | 29885 | 28395 | 1491 | 496 | 54.81 (9.8)  | Endolysin                            | Putative lysin [ <i>Staphylococcus</i> phage GH15] (0.0)                    | 99% (100%)  | YP_007002194.1 | CHAP[ <i>pfam05257</i> ], (1.42e-11)<br>Amidase_2[ <i>pfam01510</i> ], (4.58e-10)<br>SH3b[ <i>smart00287</i> ], (2.66e-03) |
| 58 | 30388 | 29885 | 504  | 167 | 18.11 (3.88) | Holin                                | Putative holin [ <i>Staphylococcus</i> phage GH15] (2e-114)                 | 98% (99%)   | YP_007002195.1 | Phage_holin_1[ <i>pfam04531</i> ], (1.28e-31)                                                                              |
| 59 | 30658 | 30473 | 186  | 61  | 7.06 (4.81)  | Hypothetical protein                 | ORF233 [ <i>Staphylococcus</i> phage G1] (1e-33)                            | 100% (100%) | YP_241098.1    |                                                                                                                            |
| 60 | 32429 | 32211 | 219  | 72  | 8.67 (9.36)  | Hypothetical protein                 | ORF200 [ <i>Staphylococcus</i> phage G1] (4e-45)                            | 100% (100%) | YP_241099.1    |                                                                                                                            |
| 61 | 33118 | 32909 | 210  | 69  | 7.76 (5.57)  | Hypothetical protein                 | Hypothetical protein GH15_075 [ <i>Staphylococcus</i> phage GH15] (1e-40)   | 100% (100%) | YP_007002198.1 |                                                                                                                            |

|    |       |       |      |     |               |                                           |                                                                                   |             |                |                                                                                                |
|----|-------|-------|------|-----|---------------|-------------------------------------------|-----------------------------------------------------------------------------------|-------------|----------------|------------------------------------------------------------------------------------------------|
| 62 | 33463 | 33131 | 333  | 110 | 12.50 (5.08)  | Hypothetical protein                      | Hypothetical protein GH15_076<br>[ <i>Staphylococcus</i> phage GH15] (8e-69)      | 99% (100%)  | YP_007002199.1 |                                                                                                |
| 63 | 33802 | 33476 | 327  | 108 | 13.01 (5.14)  | Membrane protein                          | Putative membrane protein [ <i>Staphylococcus</i><br>phage GH15] (1e-69)          | 98% (99%)   | YP_007002200.1 |                                                                                                |
| 64 | 34243 | 34629 | 387  | 128 | 14.84 (9.31)  | Membrane protein                          | Hypothetical protein [ <i>Staphylococcus</i> phage<br>S25-4] (8e-81)              | 98% (100%)  | YP_008854032.1 |                                                                                                |
| 65 | 34607 | 34885 | 279  | 92  | 10.57 (10.03) | Hypothetical protein                      | ORF161 [ <i>Staphylococcus</i> phage G1] (2e-60)                                  | 100% (100%) | YP_241104.1    |                                                                                                |
| 66 | 34882 | 35292 | 411  | 136 | 15.62 (4.38)  | Hypothetical protein                      | ORF133 [ <i>Staphylococcus</i> phage G1] (6e-91)                                  | 99% (100%)  | YP_241105.1    |                                                                                                |
| 67 | 35307 | 35657 | 351  | 116 | 13.56 (9.9)   | Terminase large subunit                   | Putative terminase large subunit<br>[ <i>Staphylococcus</i> phage GH15] (2e-76)   | 100% (100%) | YP_007002205.1 |                                                                                                |
| 68 | 35897 | 36667 | 771  | 256 | 30.01 (9.2)   | Group I intron VSR<br>homing endonuclease | Group I intron protein [ <i>Staphylococcus</i><br>phage vB_SauM_Romulus] (7e-134) | 89% (94%)   | YP_007677505.1 | Very-short-patch-repair endonuclease<br>[Replication, recombination, and repair]<br>(3.42e-03) |
| 69 | 36734 | 38194 | 1461 | 486 | 56.37 (5.74)  | Terminase large subunit                   | Ter [ <i>Staphylococcus</i> phage MSA6] (0.0)                                     | 100% (100%) | AFN38730.1     | Terminase_GpA[pfam05876] (1.62e-17)                                                            |
| 70 | 38187 | 39008 | 822  | 273 | 30.6 (4.92)   | Hypothetical protein                      | Hypothetical protein GH15_083<br>[ <i>Staphylococcus</i> phage GH15] (0.0)        | 96% (99%)   | YP_007002206.1 |                                                                                                |
| 71 | 39165 | 39644 | 480  | 159 | 18.53 (4.62)  | Hypothetical protein                      | Hypothetical protein GH15_085<br>[ <i>Staphylococcus</i> phage GH15] (5e-109)     | 100% (100%) | YP_007002208.1 |                                                                                                |
| 72 | 39686 | 40936 | 1251 | 416 | 45.82 (3.89)  | Membrane protein                          | Putative membrane protein [ <i>Staphylococcus</i><br>phage GH15] (0.0)            | 94% (95%)   | YP_007002209.1 |                                                                                                |
| 73 | 41021 | 41362 | 342  | 113 | 12.82 (9.61)  | Membrane protein                          | Putative membrane protein [ <i>Staphylococcus</i><br>phage GH15] (1e-71)          | 100% (100%) | YP_007002210.1 |                                                                                                |
| 74 | 41372 | 41752 | 381  | 126 | 14.84 (6.14)  | Hypothetical protein                      | Hypothetical protein KgORF40<br>[ <i>Staphylococcus</i> phage K] (2e-82)          | 99% (100%)  | YP_024470.1    |                                                                                                |
| 75 | 41756 | 43447 | 1692 | 563 | 64.04 (6.19)  | Portal protein                            | Putative portal protein [ <i>Staphylococcus</i><br>phage GH15] (0.0)              | 99% (100%)  | YP_007002212.1 | Phage_portal[pfam04860], (1.99e-14)                                                            |
| 76 | 43641 | 44414 | 774  | 257 | 28.62 (4.71)  | Prohead protease                          | Hypothetical protein KgORF42<br>[ <i>Staphylococcus</i> phage K] (0.0)            | 99% (100%)  | YP_024472.1    | Peptidase_U35[pfam04586], (2.03e-05)                                                           |
| 77 | 44433 | 45383 | 951  | 316 | 35.74 (4.17)  | Hypothetical protein                      | Hypothetical protein KgORF43<br>[ <i>Staphylococcus</i> phage K] (0.0)            | 100% (100%) | YP_024473.1    |                                                                                                |
| 78 | 45499 | 46890 | 1392 | 463 | 51.27 (4.9)   | Capsid protein                            | Putative capsid protein [ <i>Staphylococcus</i><br>phage K] (0.0)                 | 100% (100%) | YP_024474.1    |                                                                                                |
| 79 | 46982 | 47278 | 297  | 98  | 11.28 (9.88)  | Hypothetical protein                      | ORF151 [ <i>Staphylococcus</i> phage G1] (1e-59)                                  | 100% (100%) | YP_240904.1    |                                                                                                |
| 80 | 47291 | 48199 | 909  | 302 | 34.16 (4.93)  | Hypothetical protein                      | Hypothetical protein KgORF45<br>[ <i>Staphylococcus</i> phage K] (0.0)            | 100% (100%) | YP_024475.1    |                                                                                                |
| 81 | 48213 | 49091 | 879  | 292 | 33.71 (5.99)  | Hypothetical protein                      | hypothetical protein GH15_095<br>[ <i>Staphylococcus</i> phage GH15] (0.0)        | 99% (100%)  | YP_007002218.1 |                                                                                                |
| 82 | 49091 | 49711 | 621  | 206 | 23.73 (10.85) | Hypothetical protein                      | Hypothetical protein GH15_096                                                     | 99% (100%)  | YP_007002219.1 |                                                                                                |



|     |       |       |      |      |               |                                          |                                                                                                      |             |                |                                                                                          |
|-----|-------|-------|------|------|---------------|------------------------------------------|------------------------------------------------------------------------------------------------------|-------------|----------------|------------------------------------------------------------------------------------------|
|     |       |       |      |      |               |                                          | [ <i>Staphylococcus</i> phage GH15] (9e-148)                                                         |             |                |                                                                                          |
| 83  | 49730 | 50566 | 837  | 278  | 31.76 (4.47)  | Hypothetical protein                     | Hypothetical protein KgORF48<br>[ <i>Staphylococcus</i> phage K] (0.0)                               | 100% (100%) | YP_024478.1    |                                                                                          |
| 84  | 50568 | 50783 | 216  | 71   | 8.28 (9.14)   | Hypothetical protein                     | ORF202 [ <i>Staphylococcus</i> phage G1] (3e-45)                                                     | 100% (100%) | YP_240909.1    |                                                                                          |
| 85  | 50810 | 52573 | 1764 | 587  | 64.43 (4.69)  | Major tail sheath protein                | Major tail sheath protein [ <i>Staphylococcus</i><br>phage 812] (0.0)                                | 99% (100%)  | ABL87117.1     | pfam04984: Phage_sheath_1 (1.73e-4)                                                      |
| 86  | 52646 | 52984 | 339  | 112  | 12.45 (9.01)  | Tail tube protein                        | TmpA [ <i>Staphylococcus</i> phage A3R] (4e-73)                                                      | 98% (99%)   | AFN38130.1     |                                                                                          |
| 87  | 53779 | 54783 | 1005 | 334  | 39.42 (9.17)  | Ioh                                      | Ioh [ <i>Staphylococcus</i> phage A3R] (3e-39)                                                       | 35% (51%)   | AFN38131.1     |                                                                                          |
| 88  | 54840 | 54980 | 141  | 46   | 5.39 (11.19)  | Hypothetical protein                     | Hypothetical protein phi_A3R_ORF076<br>[ <i>Staphylococcus</i> phage A3R] (4e-16)                    | 76% (89%)   | AFN38132.1     |                                                                                          |
| 89  | 55023 | 55481 | 459  | 152  | 18.12 (10.02) | Hypothetical protein                     | Hypothetical protein KgORF51<br>[ <i>Staphylococcus</i> phage K] (9e-105)                            | 97% (100%)  | YP_024481.1    |                                                                                          |
| 90  | 55494 | 55688 | 195  | 64   | 7.15 (9.87)   | Hypothetical protein                     | ORF215 [ <i>Staphylococcus</i> phage G1] (3e-34)                                                     | 100% (100%) | YP_240914.1    |                                                                                          |
| 91  | 55770 | 56081 | 312  | 103  | 12.25 (5.8)   | Hypothetical protein                     | Hypothetical protein KgORF52<br>[ <i>Staphylococcus</i> phage K] (9e-66)                             | 100% (100%) | YP_024482.1    |                                                                                          |
| 92  | 56213 | 56671 | 459  | 152  | 18.15 (4.50)  | Hypothetical protein                     | Hypothetical protein KgORF53<br>[ <i>Staphylococcus</i> phage K] (5e-105)                            | 100% (100%) | YP_024483.1    |                                                                                          |
| 93  | 56715 | 57251 | 537  | 178  | 20.92 (4.01)  | Tail morphogenetic protein               | Hypothetical protein KgORF54<br>[ <i>Staphylococcus</i> phage K] (1e-125)                            | 100% (100%) | YP_024484.1    |                                                                                          |
| 94  | 57307 | 61362 | 4056 | 1351 | 143.77 (9.51) | TMP                                      | Tail morphogenetic protein, tape measure<br>protein [ <i>Staphylococcus</i> phage phiSA012]<br>(0.0) | 99% (100%)  | BAO47136.1     | TACC[Cdd:pfam05010], (7.75e-06)                                                          |
| 95  | 61441 | 63867 | 2427 | 808  | 91.25 (6.30)  | CHAP domain protein                      | Hypothetical protein KgORF56<br>[ <i>Staphylococcus</i> phage K] (0.0)                               | 99% (99%)   | YP_024486.1    | CHAP[pfam05257], (6.45e-17)                                                              |
| 96  | 63881 | 64768 | 888  | 295  | 34.58 (4.21)  | Protease                                 | Hypothetical protein GH15_109<br>[ <i>Staphylococcus</i> phage GH15] (0.0)                           | 99% (99%)   | YP_007002232.1 | IPR000064 Endopeptidase (0.00054)                                                        |
| 97  | 64768 | 67314 | 2547 | 848  | 95.99 (4.61)  | Glycerophosphoryl diester<br>phosphatase | Glycerophosphoryl diester<br>phosphodiesterase [ <i>Staphylococcus</i> phage<br>JD007] (0.0)         | 99% (99%)   | YP_007112758.1 | GDPD_SaGlpQ_like[cd08601] (6.54e-69)                                                     |
| 98  | 67421 | 68212 | 792  | 263  | 29.32 (8.75)  | Hypothetical protein                     | Hypothetical protein KgORF59<br>[ <i>Staphylococcus</i> phage K] (0.0)                               | 99% (100%)  | YP_024489.1    |                                                                                          |
| 99  | 68212 | 68736 | 525  | 174  | 19.95 (4.24)  | Hypothetical protein                     | ORF078 [ <i>Staphylococcus</i> phage G1] (3e-<br>121)                                                | 100% (100%) | YP_240925.1    |                                                                                          |
| 100 | 68736 | 69440 | 705  | 234  | 26.58 (4.44)  | Baseplate protein                        | Putative bacteriophage baseplate protein<br>[ <i>Staphylococcus</i> phage K] (6e-171)                | 100% (100%) | YP_024491.1    |                                                                                          |
| 101 | 69455 | 70501 | 1047 | 348  | 39.2 (4.53)   | Baseplate protein                        | Hypothetical protein KgORF62<br>[ <i>Staphylococcus</i> phage K] (0.0)                               | 100% (100%) | YP_024492.1    | LysM[cd00118] (4.35e-03) [COG3628],<br>Phage baseplate assembly protein W (2.23e-<br>04) |

|     |       |       |      |      |               |                                     |                                                                          |             |                |                                                       |
|-----|-------|-------|------|------|---------------|-------------------------------------|--------------------------------------------------------------------------|-------------|----------------|-------------------------------------------------------|
| 102 | 70522 | 73587 | 3066 | 1021 | 116.45 (4.76) | Hypothetical protein                | Hypothetical protein KgORF63 [Staphylococcus phage K] (0.0)              | 90% (94%)   | YP_024493.1    | IPR006949 Baseplate assembly protein J-like (4.5e-26) |
| 103 | 73698 | 74219 | 522  | 173  | 19.23 (5.12)  | Baseplate protein                   | Hypothetical protein KgORF64 [Staphylococcus phage K] (4e-122)           | 100% (100%) | YP_024494.1    | Phage-Gp8[pfam09215], (1.40e-03)                      |
| 104 | 74240 | 77698 | 3459 | 1152 | 129.33 (4.84) | Adsorption-associated tail protein  | Adsorption-associated tail protein [Staphylococcus phage JD007] (0.0)    | 99% (99%)   | YP_007112751.1 |                                                       |
| 105 | 77747 | 77905 | 159  | 52   | 62.8 (9.20)   | Hypothetical protein                | ORF262 [Staphylococcus phage G1] (9e-27)                                 | 100% (100%) | YP_240931.1    |                                                       |
| 106 | 77906 | 79825 | 1920 | 639  | 72.4 (6.22)   | Carbohydrate binding domain protein | Hypothetical protein [Staphylococcus phage JD007] (0.0)                  | 97% (98%)   | YP_007112749.1 | IPR003305Carbohydrate-binding, (5.4e-07)              |
| 107 | 79847 | 80218 | 372  | 123  | 14.49 (4.58)  | Hypothetical protein                | Hypothetical protein [Staphylococcus phage JD007] (7e-83)                | 100% (100%) | YP_007112748.1 |                                                       |
| 108 | 80225 | 81601 | 1377 | 458  | 50.49 (5.64)  | Hypothetical protein                | Hypothetical protein [Staphylococcus phage JD007] (0.0)                  | 98% (98%)   | YP_007112747.1 |                                                       |
| 109 | 81691 | 83439 | 1749 | 582  | 67.23 (5.46)  | DNA helicase                        | Putative helicase [Staphylococcus phage K] (0.0)                         | 99% (100%)  | YP_024499.1    | Helicase, C-terminal (IPR001650) (7.6e-15)            |
| 110 | 83451 | 85064 | 1614 | 537  | 63.14 (8.28)  | Rep protein                         | Putative Rep protein [Staphylococcus phage GH15] (0.0)                   | 99% (99%)   | YP_007002246.1 | HTH_ARSR[cd00090] (1.49e-04)                          |
| 111 | 85057 | 86499 | 1443 | 480  | 54.58 (5.38)  | ATPase                              | Putative ATPase [Staphylococcus phage K] (0.0)                           | 99% (99%)   | YP_024501.1    | IPR003593 AAA+ ATPase domain (1.4e-05)                |
| 112 | 86578 | 86997 | 420  | 139  | 16.18 (5.39)  | Hypothetical protein                |                                                                          |             |                |                                                       |
| 113 | 86997 | 88022 | 1026 | 341  | 39.34 (4.76)  | Exonuclease                         | Hypothetical protein [Staphylococcus phage S25-4] (0.0)                  | 96% (98%)   | YP_008854079.1 | MPP_Mre11_N[cd00840], (9.51e-25)                      |
| 114 | 88022 | 88399 | 378  | 125  | 15.17 (4.81)  | Hypothetical protein                | Hypothetical protein KgORF73 [Staphylococcus phage K] (9e-72)            | 84% (92%)   | YP_024503.1    |                                                       |
| 115 | 88399 | 90318 | 1920 | 639  | 73.34 (4.96)  | ATPase                              | Hypothetical protein [Staphylococcus phage S25-4] (0.0)                  | 98% (99%)   | YP_008854081.1 | ABC_ATPase[cd00267], (1.18e-04)                       |
| 116 | 90318 | 90914 | 597  | 198  | 23.20 (5.96)  | Hypothetical protein                | Hypothetical protein [Staphylococcus phage JD007] (5e-140)               | 98% (99%)   | YP_007112958.1 |                                                       |
| 117 | 90929 | 91996 | 1068 | 355  | 41.04 (8.50)  | DNA Primase                         | Putative primase [Staphylococcus phage K] (0.0)                          | 99% (99%)   | YP_024506.1    | TOPRIM_DnaG_primases[cd03364], (2.75e-07)             |
| 118 | 92062 | 92400 | 339  | 112  | 12.88 (3.98)  | Hypothetical protein                | ORF127 [Staphylococcus phage G1] (1e-69)                                 | 98% (99%)   | YP_240943.1    |                                                       |
| 119 | 92400 | 92852 | 453  | 150  | 17.10 (4.69)  | Hypothetical protein                | Hypothetical protein phi_676Z_ORF107 [Staphylococcus phage 676Z] (2e-96) | 95% (99%)   | AFN38356.1     |                                                       |
| 120 | 92839 | 93447 | 609  | 202  | 23.64 (5.36)  | Resolvase                           | Resolvase [Staphylococcus phage JD007] (4e-146)                          | 99% (100%)  | YP_007112954.1 | tRNA endonuclease-like domain (IPR011856)( 4.6e-06)   |
| 121 | 93437 | 93856 | 420  | 139  | 15.75 (10.18) | Ribonucleotide reductase flavodoxin | gp ORF109 [Staphylococcus phage A5W] (9e-92)                             | 98% (98%)   | ACB89102.1     | nrdI[PRK03600],(2.13e-25)                             |
| 122 | 93871 | 95985 | 2115 | 704  | 80.30 (5.39)  | Ribonucleotide reductase            | Putative ribonucleotide reductase large                                  | 99% (99%)   | YP_007002258.1 | Ribonuc_red_lgC[pfam02867], (6.96e-176)               |

|     |        |        |      |      |               |                                        |                                                                                    |             |                |                                       |
|-----|--------|--------|------|------|---------------|----------------------------------------|------------------------------------------------------------------------------------|-------------|----------------|---------------------------------------|
|     |        |        |      |      |               | large subunit                          | subunit [ <i>Staphylococcus</i> phage GH15] (0.0)                                  |             |                |                                       |
| 123 | 95999  | 97048  | 1050 | 349  | 40.45 (4.5)   | Ribonucleotide reductase small subunit | Ribonucleoside-diphosphate beta subunit [ <i>Staphylococcus</i> phage JD007] (0.0) | 98% (99%)   | YP_007112951.1 | RNRR2[cd01049], (1.58e-59)            |
| 124 | 97066  | 97395  | 330  | 109  | 12.48 (4.39)  | Hypothetical protein                   | Hypothetical protein [ <i>Staphylococcus</i> phage JD007] (2e-69)                  | 96% (97%)   | YP_007112950.1 |                                       |
| 125 | 97379  | 97699  | 321  | 106  | 12.04 (4.57)  | Thioredoxin-like protein               | Thioredoxin-like protein [ <i>Staphylococcus</i> phage K] (4e-68)                  | 99% (100%)  | YP_024513.1    | TRX_family[cd02947], (7.08e-08)       |
| 126 | 97906  | 98502  | 597  | 198  | 23.59 (6.25)  | Hypothetical protein                   | Hypothetical protein GH15_139 [ <i>Staphylococcus</i> phage GH15] (2e-140)         | 100% (100%) | YP_007002262.1 |                                       |
| 127 | 98512  | 98817  | 306  | 101  | 11.92 (5.62)  | Integration host factor                | Putative integration host factor [ <i>Staphylococcus</i> phage K] (5e-66)          | 100% (100%) | YP_024515.1    | HU_IHF[cd00591], (7.28e-08)           |
| 128 | 98893  | 102111 | 3219 | 1072 | 124.57 (5.21) | DNA polymerase                         | DNA polymerase I [ <i>Staphylococcus</i> phage phiSA012] (0.0)                     | 99% (99%)   | BAO47171.1     | DNA_pol_A_pol_I_C[cd08637] (5.79e-80) |
| 129 | 102181 | 102423 | 243  | 80   | 9.26 (3.83)   | Hypothetical protein                   | Hypothetical protein [ <i>Staphylococcus</i> phage S25-4] (2e-48)                  | 98% (100%)  | YP_008854095.1 |                                       |
| 130 | 102440 | 102922 | 483  | 160  | 18.94 (5.12)  | Hypothetical protein                   | Hypothetical protein GH15_143 [ <i>Staphylococcus</i> phage GH15] (2e-113)         | 99% (100%)  | YP_007002266.1 |                                       |
| 131 | 103009 | 104280 | 1272 | 423  | 47.01 (4.44)  | Hypothetical protein                   | Hypothetical protein GH15_144 [ <i>Staphylococcus</i> phage GH15] (0.0)            | 98% (99%)   | YP_007002267.1 |                                       |
| 132 | 104340 | 105596 | 1257 | 418  | 46.76 (4.95)  | DNA repair protein                     | Putative DNA repair protein [ <i>Staphylococcus</i> phage GH15] (0.0)              | 99% (100%)  | YP_007002268.1 | recA[cd00983] (1.49e-36)              |
| 133 | 105600 | 105953 | 354  | 117  | 13.38 (4.89)  | Hypothetical protein                   | ORF121 [ <i>Staphylococcus</i> phage G1] (6e-79)                                   | 100% (100%) | YP_240963.1    |                                       |
| 134 | 105940 | 106602 | 663  | 220  | 26.60 (5.07)  | Sigma factor                           | Putative sigma factor [ <i>Staphylococcus</i> phage K] (1e-155)                    | 100% (100%) | YP_024522.1    |                                       |
| 135 | 106730 | 107362 | 633  | 210  | 23.21 (4.46)  | Putative Ig-like protein               | Hypothetical protein KgORF95 [ <i>Staphylococcus</i> phage K] (3e-149)             | 99% (100%)  | YP_024523.1    |                                       |
| 136 | 107385 | 107897 | 513  | 170  | 17.83 (4.13)  | Major tail protein                     | Putative major tail protein [ <i>Staphylococcus</i> phage K] (4e-113)              | 99% (100%)  | YP_024524.1    | Big_2[pfam02368], (1.65e-05)          |
| 137 | 107912 | 108139 | 228  | 75   | 7.81 (4.17)   | Tail protein                           | ORF189 [ <i>Staphylococcus</i> phage G1] (9e-45)                                   | 100% (100%) | YP_240967.1    |                                       |
| 138 | 108235 | 108495 | 261  | 86   | 10.27 (5.52)  | Hypothetical protein                   | Hypothetical protein GH15_151 [ <i>Staphylococcus</i> phage GH15] (8e-55)          | 100% (100%) | YP_007002274.1 |                                       |
| 139 | 108499 | 109254 | 756  | 251  | 29.15 (4.21)  | Hypothetical protein                   | Hypothetical protein KgORF97 [ <i>Staphylococcus</i> phage K] (8e-180)             | 100% (100%) | YP_024525.1    |                                       |
| 140 | 109247 | 110497 | 1251 | 416  | 47.56 (5.64)  | DNA polymerase                         | DNA polymerase [ <i>Staphylococcus</i> phage JD007] (0.0)                          | 99% (100%)  | YP_007112932.1 |                                       |
| 141 | 110511 | 110879 | 369  | 122  | 13.99 (5.56)  | Hypothetical protein                   | Hypothetical protein KgORF99 [ <i>Staphylococcus</i> phage K] (2e-80)              | 100% (100%) | YP_024527.1    |                                       |
| 142 | 110866 | 111177 | 312  | 103  | 12.01 (4.43)  | Hypothetical protein                   | Hypothetical protein KgORF100                                                      | 100% (100%) | YP_024528.1    |                                       |

|     |        |        |     |     |               |                                                               |                                                                                                                     |             |                |  |
|-----|--------|--------|-----|-----|---------------|---------------------------------------------------------------|---------------------------------------------------------------------------------------------------------------------|-------------|----------------|--|
|     |        |        |     |     |               |                                                               | [ <i>Staphylococcus</i> phage K] (7e-68)                                                                            |             |                |  |
| 143 | 111241 | 111777 | 537 | 178 | 20.78 (6.39)  | Hypothetical protein                                          | Hypothetical protein [ <i>Staphylococcus</i> phage phiSA012] (3e-126)                                               | 99% (100%)  | BAO47187.1     |  |
| 144 | 111770 | 112537 | 768 | 255 | 30.04 (9.83)  | Hypothetical protein                                          | Hypothetical protein KgORF101 [ <i>Staphylococcus</i> phage K] (0.0)                                                | 100% (100%) | YP_024529.1    |  |
| 145 | 112515 | 112961 | 447 | 148 | 17.33 (10.63) | Hypothetical protein                                          | Hypothetical protein KgORF102 [ <i>Staphylococcus</i> phage K] (4e-103)                                             | 100% (100%) | YP_024530.1    |  |
| 146 | 112961 | 113824 | 864 | 287 | 32.35 (5.40)  | Hypothetical protein                                          | ORF036 [ <i>Staphylococcus</i> phage G1] (0.0)                                                                      | 100% (100%) | YP_240976.1    |  |
| 147 | 114196 | 114927 | 732 | 243 | 28.35 (5.05)  | Hypothetical protein                                          | Hypothetical protein KgORF103 [ <i>Staphylococcus</i> phage K] (1e-172)                                             | 100% (100%) | YP_024531.1    |  |
| 148 | 114945 | 115403 | 459 | 152 | 17.84 (4.62)  | Hypothetical protein                                          | Hypothetical protein GH15_161 [ <i>Staphylococcus</i> phage GH15] (2e-105)                                          | 100% (100%) | YP_007002284.1 |  |
| 149 | 115468 | 115911 | 444 | 147 | 17.50 (5.96)  | Hypothetical protein                                          | Hypothetical protein KgORF105 [ <i>Staphylococcus</i> phage K] (2e-98)                                              | 100% (100%) | YP_024533.1    |  |
| 150 | 115928 | 116632 | 705 | 234 | 27.36 (4.37)  | Hypothetical protein                                          | Hypothetical protein KgORF106 [ <i>Staphylococcus</i> phage K] (4e-167)                                             | 99% (100%)  | YP_024534.1    |  |
| 151 | 116694 | 117092 | 399 | 132 | 15.42 (9.30)  | Hypothetical protein                                          | Hypothetical protein KgORF107 [ <i>Staphylococcus</i> phage K] (6e-90)                                              | 100% (100%) | YP_024535.1    |  |
| 152 | 117239 | 117481 | 243 | 80  | 9.39 (9.79)   | Hypothetical protein                                          | ORF182 [ <i>Staphylococcus</i> phage G1] (3e-48)                                                                    | 100% (100%) | YP_240982.1    |  |
| 153 | 117486 | 118043 | 558 | 185 | 21.67 (9.88)  | Membrane protein                                              | Hypothetical protein PhageK_168 [ <i>Staphylococcus</i> phage K] (2e-130)                                           | 99% (100%)  | AHB80083.1     |  |
| 154 | 118079 | 118255 | 177 | 58  | 6.98 (4.37)   | Hypothetical protein                                          | ORF240 [ <i>Staphylococcus</i> phage G1] (2e-32)                                                                    | 100% (100%) | YP_240984.1    |  |
| 155 | 118248 | 118496 | 249 | 82  | 9.04 (9.72)   | Membrane protein                                              | Hypothetical protein [ <i>Staphylococcus</i> phage JD007] (1e-46)                                                   | 94% (98%)   | YP_007112917.1 |  |
| 156 | 118489 | 118722 | 234 | 77  | 88.93 (7.61)  | Hypothetical protein                                          | Hypothetical protein [ <i>Staphylococcus</i> phage S25-3] (5e-42)                                                   | 90% (96%)   | YP_008854298.1 |  |
| 157 | 118804 | 119448 | 645 | 214 | 25.20 (5.49)  | Ribulose-1,5-bisphosphate carboxylase/oxygenase small subunit | Putative ribulose-1,5-bisphosphate carboxylase/oxygenase small subunit [ <i>Staphylococcus</i> phage GH15] (1e-145) | 98% (99%)   | YP_007002293.1 |  |
| 158 | 119464 | 119712 | 249 | 82  | 9.04 (9.72)   | Hypothetical protein                                          | Hypothetical protein [ <i>Staphylococcus</i> phage S25-4] (1e-35)                                                   | 94% (100%)  | YP_008854124.1 |  |
| 159 | 119724 | 119900 | 177 | 58  | 6.9 (10.19)   | Hypothetical protein                                          | Hypothetical protein phi_676Z_ORF149 [ <i>Staphylococcus</i> phage 676Z] (1e-30)                                    | 98% (98%)   | AFN38398.1     |  |
| 160 | 119893 | 120189 | 297 | 98  | 11.47 (8.99)  | Hypothetical protein                                          | Hypothetical protein GH15_172 [ <i>Staphylococcus</i> phage GH15] (3e-62)                                           | 98% (99%)   | YP_007002295.1 |  |
| 161 | 120237 | 120419 | 183 | 60  | 7.13 (9.35)   | Membrane protein                                              | ORF219 [ <i>Staphylococcus</i> phage G1] (2e-32)                                                                    | 98% (100%)  | YP_240988.1    |  |
| 162 | 120432 | 120803 | 372 | 123 | 14.34 (3.99)  | Hypothetical protein                                          | Hypothetical protein GH15_174 [ <i>Staphylococcus</i> phage GH15] (3e-75)                                           | 93% (97%)   | YP_007002297.1 |  |

|     |        |        |      |     |                |                                            |                                                                                             |             |                |                                    |
|-----|--------|--------|------|-----|----------------|--------------------------------------------|---------------------------------------------------------------------------------------------|-------------|----------------|------------------------------------|
| 163 | 120816 | 121163 | 348  | 115 | 12.97 (4.37)   | Hypothetical protein                       | Hypothetical protein GH15_175<br>[ <i>Staphylococcus</i> phage GH15] (4e-76)                | 99% (100%)  | YP_007002298.1 |                                    |
| 164 | 121169 | 121441 | 273  | 90  | 9.99 (4.03)    | Membrane protein                           | Putative membrane protein [ <i>Staphylococcus</i><br>phage GH15] (4e-53 )                   | 98% (99%)   | YP_007002299.1 |                                    |
| 165 | 121511 | 121816 | 306  | 101 | 12.14 (9.61)   | Hypothetical protein                       | ORF140 [ <i>Staphylococcus</i> phage G1] (8e-67)                                            | 100% (100%) | YP_240992.1    |                                    |
| 166 | 121831 | 122181 | 351  | 116 | 136.67 (10.24) | Hypothetical protein                       | Hypothetical protein GH15_178<br>[ <i>Staphylococcus</i> phage GH15] (2e-75)                | 100% (100%) | YP_007002301.1 |                                    |
| 167 | 122215 | 122394 | 180  | 59  | 7.3 (7.17)     | Hypothetical protein                       | Hypothetical protein GH15_180<br>[ <i>Staphylococcus</i> phage GH15] (1e-33)                | 97% (100%)  | YP_007002303.1 |                                    |
| 168 | 122620 | 123030 | 411  | 136 | 15.32 (4.37)   | Membrane protein                           | Putative membrane protein [ <i>Staphylococcus</i><br>phage GH15] (9e-86)                    | 94% (99%)   | YP_007002304.1 |                                    |
| 169 | 123032 | 123256 | 225  | 74  | 8.51 (6.54)    | Hypothetical protein                       | Hypothetical protein GH15_198<br>[ <i>Staphylococcus</i> phage GH15] (5e-44)                | 96% (100%)  | YP_007002321.1 |                                    |
| 170 | 123269 | 123469 | 201  | 66  | 7.60 (4.90)    | Hypothetical protein                       | ORF211 [ <i>Staphylococcus</i> phage G1] (5e-41)                                            | 100% (100%) | YP_241008.1    |                                    |
| 171 | 123470 | 123760 | 291  | 96  | 11.13 (9.48)   | Membrane protein                           | Putative membrane protein [ <i>Staphylococcus</i><br>phage GH15] (6e-59)                    | 100% (100%) | YP_007002323.1 |                                    |
| 172 | 123853 | 124146 | 294  | 97  | 11.41 (6.15)   | Hypothetical protein                       | Hypothetical protein GH15_201<br>[ <i>Staphylococcus</i> phage GH15] (1e-63)                | 100% (100%) | YP_007002324.1 |                                    |
| 173 | 124143 | 125051 | 909  | 302 | 34.92 (4.98)   | Phosphoribosyl<br>pyrophosphate synthetase | Putative ribose-phosphate<br>pyrophosphokinase [ <i>Staphylococcus</i> phage<br>GH15] (0.0) | 96% (98%)   | YP_007002325.1 | ibP_PPkin[TIGR01251], (7.63e-17)   |
| 174 | 125069 | 126538 | 1470 | 489 | 56.04 (5.05)   | Nicotinamide<br>phosphoribosyltransferase  | Nicotinamide phosphoribosyl transferase<br>[ <i>Staphylococcus</i> phage phiSA012] (0.0)    | 98% (98%)   | BAO47229.1     | NAPRTase_PncB[cd01567], (3.65e-95) |
| 175 | 126629 | 126940 | 312  | 103 | 11.87 (9.34)   | Hypothetical protein                       |                                                                                             |             |                |                                    |
| 176 | 126957 | 127190 | 234  | 77  | 9.27 (4.56)    | Hypothetical protein                       |                                                                                             |             |                |                                    |
| 177 | 127270 | 127464 | 195  | 64  | 7.41 (4.46)    | Hypothetical protein                       | Hypothetical protein GH15_196<br>[ <i>Staphylococcus</i> phage GH15] (5e-20)                | 65% (80%)   | YP_007002319.1 |                                    |
| 178 | 127478 | 127801 | 324  | 107 | 12.53 (6.37)   | Hypothetical protein                       |                                                                                             |             |                |                                    |
| 179 | 127814 | 128176 | 363  | 120 | 14.21 (4.51)   | Hypothetical protein                       |                                                                                             |             |                |                                    |
| 180 | 128176 | 128415 | 240  | 79  | 9.28 (4.16)    | Hypothetical protein                       | Hypothetical protein GH15_212<br>[ <i>Staphylococcus</i> phage GH15] (5e-07)                | 54% (70%)   | YP_007002335.1 |                                    |
| 181 | 128488 | 128898 | 411  | 136 | 16.29 (4.72)   | Hypothetical protein                       | ORF113 [ <i>Staphylococcus</i> phage G1] (6e-78)                                            | 94% (97%)   | YP_241014.1    |                                    |
| 182 | 128903 | 129157 | 255  | 84  | 9.88 (4.38)    | Hypothetical protein                       | Hypothetical protein PhageK_205<br>[ <i>Staphylococcus</i> phage K] (7e-40)                 | 78% (92%)   | AHB80120.1     | Clr2[Cdd:pfam10383], (9.04e-03)    |
| 183 | 129261 | 129659 | 399  | 132 | 15.12 (5.15)   | Hypothetical protein                       |                                                                                             |             |                |                                    |
| 184 | 129673 | 130101 | 429  | 142 | 16.52 (4.31)   | Hypothetical protein                       |                                                                                             |             |                |                                    |
| 185 | 130103 | 130378 | 276  | 91  | 10.70 (4.57)   | Hypothetical protein                       | Hypothetical protein GH15_213                                                               | 72% (88%)   | YP_007002336.1 |                                    |

|     |        |        |     |     |               |                         |                                                                            |             |                   |                                      |
|-----|--------|--------|-----|-----|---------------|-------------------------|----------------------------------------------------------------------------|-------------|-------------------|--------------------------------------|
|     |        |        |     |     |               |                         | [ <i>Staphylococcus</i> phage GH15] (4e-32)                                |             |                   |                                      |
| 186 | 130392 | 130781 | 390 | 129 | 14.35 (5.03)  | Hypothetical protein    |                                                                            |             |                   |                                      |
| 187 | 130897 | 131523 | 627 | 208 | 23.19 (4.24)  | Hypothetical protein    | Putative uncharacterized protein [ <i>Staphylococcus equorum</i> ] (3e-20) | 36% (46%)   | WP_002512196.1    |                                      |
| 188 | 131604 | 131720 | 117 | 38  | 4.51 (10.52)  | Hypothetical protein    |                                                                            |             |                   |                                      |
| 189 | 131734 | 132135 | 402 | 133 | 16.03 (8.85)  | Hypothetical protein    | Hypothetical protein [ <i>Staphylococcus</i> phage phiSA012] (8e-45)       | 59% (77%)   | YP_024544.1       |                                      |
| 190 | 132167 | 132376 | 210 | 69  | 8.33 (4.04)   | Hypothetical protein    | Hypothetical protein [ <i>Staphylococcus epidermidis</i> ] (2e-07)         | 47% (65%)   | WP_002493393.1    |                                      |
| 191 | 132376 | 132732 | 357 | 118 | 13.49 (5.03)  | Hypothetical protein    |                                                                            |             |                   |                                      |
| 192 | 133332 | 133631 | 300 | 99  | 11.56 (4.18)  | TreA                    | gp ORF182 [ <i>Staphylococcus</i> phage A5W] (1e-62)                       | 96% (100%)  | ACB89175.1        |                                      |
| 193 | 133647 | 133832 | 186 | 61  | 6.67 (7.68)   | TreB                    | ORF231 [ <i>Staphylococcus</i> phage G1] (3e-25)                           | 87% (93%)   | YP_241023.1       |                                      |
| 194 | 133939 | 134226 | 288 | 95  | 10.82 (4.43)  | TreC                    | TreC [ <i>Staphylococcus</i> phage A3R] (5e-60)                            | 99% (100%)  | AFN38033.1        |                                      |
| 195 | 134226 | 134552 | 327 | 108 | 12.61 (4.07)  | TreE                    | Hypothetical protein KgORF117 [ <i>Staphylococcus</i> phage K] (9e-70)     | 99% (99%)   | YP_024545.1       |                                      |
| 196 | 134567 | 134860 | 294 | 97  | 11.62 (4.43)  | TreE                    | TreE [ <i>Staphylococcus</i> phage A3R] (3e-61)                            | 97% (98%)   | AFN38035.1        |                                      |
| 197 | 134864 | 135049 | 186 | 61  | 7.44 (8.98)   | TreF                    | ORF175 [ <i>Staphylococcus</i> phage G1] (8e-35)                           | 100% (100%) | YP_241027.1       |                                      |
| 198 | 135186 | 135479 | 294 | 97  | 11.62 (4.43)  | TreE                    | TreE [ <i>Staphylococcus</i> phage A3R] (3e-61)                            | 97% (98%)   | <u>AFN38035.1</u> |                                      |
| 199 | 135483 | 135740 | 258 | 85  | 10.23 (6.10)  | TreF                    | ORF175 [ <i>Staphylococcus</i> phage G1] (4e-54)                           | 100% (100%) | YP_241027.1       | Peptidase_C26[pfam07722], (5.58e-03) |
| 200 | 135828 | 136067 | 240 | 79  | 9.13 (4.63)   | Hypothetical protein    | gp ORF187 [ <i>Staphylococcus</i> phage A5W] (2e-45)                       | 94% (96%)   | ACB89180.1        |                                      |
| 201 | 136078 | 136425 | 348 | 115 | 13.59 (4.76)  | Hypothetical protein    | Hypothetical protein [ <i>Staphylococcus</i> phage JD007] (1e-71)          | 91% (99%)   | YP_007112864.1    |                                      |
| 202 | 136968 | 136630 | 339 | 112 | 13.47 (4.33)  | Hypothetical protein    | ORF128 [ <i>Staphylococcus</i> phage G1] (3e-70)                           | 98% (100%)  | YP_241030.1       |                                      |
| 203 | 137279 | 137587 | 309 | 102 | 11.79 (4.63)  | TreJ                    | ORF145 [ <i>Staphylococcus</i> phage G1] (8e-68)                           | 99% (99%)   | YP_241031.1       |                                      |
| 204 | 137793 | 138077 | 285 | 94  | 10.98 (8.90)  | TreK                    | gp ORF190 [ <i>Staphylococcus</i> phage A5W] (1e-60)                       | 97% (98%)   | ACB89183.1        |                                      |
| 205 | 138152 | 138343 | 192 | 63  | 7.67 (9.90)   | Hypothetical protein    | Hypothetical protein GH15_004 [ <i>Staphylococcus</i> phage GH15] (4e-37)  | 100% (100%) | YP_007002127.1    |                                      |
| 206 | 139325 | 138843 | 483 | 160 | 19.42 (9.61)  | HNH homing endonuclease | ORF085 [ <i>Staphylococcus</i> phage G1] (4e-93)                           | 85% (89%)   | YP_241035.1       | HNH_3[pfam13392](1.26e-11)           |
| 207 | 139493 | 139651 | 159 | 52  | 60.56 (10.90) | TreN                    | Hypothetical protein [ <i>Staphylococcus</i> phage S25-4] (2e-26)          | 100% (100%) | YP_008853962.1    |                                      |
| 208 | 139724 | 139870 | 147 | 48  | 5.61 (9.82)   | Hypothetical protein    |                                                                            |             |                   |                                      |

|            |        |        |     |     |              |                      |                                                                              |             |                |  |
|------------|--------|--------|-----|-----|--------------|----------------------|------------------------------------------------------------------------------|-------------|----------------|--|
| <b>209</b> | 140036 | 140359 | 324 | 107 | 12.35 (4.97) | TreP                 | Hypothetical protein GH15_006<br>[ <i>Staphylococcus</i> phage GH15] (2e-65) | 93% (96%)   | YP_007002129.1 |  |
| <b>210</b> | 140445 | 140840 | 396 | 131 | 15.39 (4.30) | Hypothetical protein | Hypothetical protein [ <i>Staphylococcus</i> phage<br>S25-3] (4e-66)         | 75% (87%)   | YP_008854145.1 |  |
| <b>211</b> | 141309 | 141530 | 222 | 73  | 8.46 (3.96)  | Hypothetical protein | Hypothetical protein [ <i>Staphylococcus</i> phage<br>S25-4] (5e-45)         | 100%(100%)  | YP_008853966.1 |  |
| <b>212</b> | 141789 | 141953 | 165 | 54  | 6.42 (4.67)  | Hypothetical protein | Hypothetical protein [ <i>Staphylococcus</i> phage<br>JD007] (4e-29)         | 100% (100%) | YP_007112853.1 |  |
| <b>213</b> | 142033 | 142269 | 237 | 78  | 9.00 (4.03)  | Hypothetical protein | hypothetical protein [ <i>Staphylococcus</i> phage<br>S25-4] (9e-39)         | 85% (97%)   | YP_008853969.1 |  |

**Table S1:** Features of bacteriophage phiIPLA-RODI *orfs*, gene products (gp) and functional assignments.

| orf | From  | To    | Length | aa  | kDa (pI)      | Predictive Function     | Closes hit (E value)                                                              | % aaidentity / % similarity | Accession no. | Predicted domain (E value)                                               |
|-----|-------|-------|--------|-----|---------------|-------------------------|-----------------------------------------------------------------------------------|-----------------------------|---------------|--------------------------------------------------------------------------|
| 1   | 1     | 216   | 216    | 71  | 8.43 (10.51)  | Hypothetical protein    | ORF151 [ <i>Staphylococcus</i> phage Twort] (2e-39)                               | 87% (98%)                   | YP_238726.1   |                                                                          |
| 2   | 621   | 2168  | 1548   | 515 | 59.78 (5.76)  | Terminase large subunit | Terminase large subunit [ <i>Staphylococcus</i> phage phiIBB-SEP1] (0.0)          | 99% (99%)                   | AGR48129.1    | Terminase_GpA[pfam05876], Phage terminase large subunit (GpA) (1.39e-20) |
| 3   | 2182  | 2985  | 804    | 267 | 30.63 (4.98)  | Hypothetical protein    | Hypothetical protein SEP1_002 [ <i>Staphylococcus</i> phage phiIBB-SEP1] (0.0)    | 99% (99%)                   | AGR48131.1    |                                                                          |
| 4   | 2972  | 3133  | 162    | 53  | 6.56 (9.53)   | Membrane protein        | Membrane protein [ <i>Staphylococcus</i> phage phiIBB-SEP1] (5e-26)               | 100% (100%)                 | AGR48132.1    |                                                                          |
| 5   | 3147  | 3638  | 492    | 163 | 19.21 (4.68)  | Hypothetical protein    | Hypothetical protein SEP1_004 [ <i>Staphylococcus</i> phage phiIBB-SEP1] (2e-110) | 99% (100%)                  | AGR48133.1    |                                                                          |
| 6   | 3715  | 4101  | 387    | 128 | 14.85 (9.57)  | Membrane protein        | Membrane protein [ <i>Staphylococcus</i> phage phiIBB-SEP1] (2e-44)               | 100% (100%)                 | AGR48134.1    |                                                                          |
| 7   | 4082  | 4453  | 372    | 123 | 14.57 (4.84)  | Hypothetical protein    | Hypothetical protein SEP1_006 [ <i>Staphylococcus</i> phage phiIBB-SEP1](1e-82)   | 99% (100%)                  | AGR48135.1    |                                                                          |
| 8   | 4455  | 6146  | 1692   | 563 | 64.21 (5.85)  | Portal protein          | Portal protein [ <i>Staphylococcus</i> phage phiIBB-SEP1] (0.0)                   | 99% (100%)                  | AGR48136.1    | Phage_portal[pfam04860], Phage portal protein (4.87e-15)                 |
| 9   | 6288  | 7058  | 771    | 256 | 28.70 (4.92)  | Prohead protease        | Hypothetical protein SEP1_008 [ <i>Staphylococcus</i> phage phiIBB-SEP1] (0.0)    | 99% (100%)                  | AGR48137.1    | Peptidase_U35[pfam04586], Caudovirus prohead protease (6.91e-06)         |
| 10  | 7061  | 8074  | 1014   | 337 | 38.40 (4.27)  | Hypothetical protein    | Hypothetical protein SEP1_009 [ <i>Staphylococcus</i> phage phiIBB-SEP1] (0.0)    | 99% (98%)                   | AGR48138.1    |                                                                          |
| 11  | 8201  | 9592  | 1392   | 463 | 51.28 (4.89)  | Major capsid protein    | Major capsid protein [ <i>Staphylococcus</i> phage phiIBB-SEP1] (0.0)             | 99% (99%)                   | AGR48139.1    |                                                                          |
| 12  | 9692  | 9958  | 267    | 88  | 10.12 (10.00) | Hypothetical protein    | Hypothetical protein SEP1_011 [ <i>Staphylococcus</i> phage phiIBB-SEP1] (4e-51)  | 99% (100%)                  | AGR48140.1    |                                                                          |
| 13  | 9968  | 10876 | 909    | 302 | 33.99 (4.65)  | Hypothetical protein    | Hypothetical protein SEP1_012 [ <i>Staphylococcus</i> phage phiIBB-SEP1] (0.0)    | 99% (99%)                   | AGR48141.1    |                                                                          |
| 14  | 10890 | 11765 | 876    | 291 | 33.45 (5.82)  | Capsid protein          | Hypothetical protein SEP1_013 [ <i>Staphylococcus</i> phage phiIBB-SEP1] (0.0)    | 98% (99%)                   | AGR48142.1    |                                                                          |
| 15  | 11765 | 12400 | 636    | 211 | 24.29 (11.22) | Hypothetical protein    | Hypothetical protein SEP1_014 [ <i>Staphylococcus</i> phage phiIBB-SEP1] (4e-41)  | 95% (96%)                   | AGR48143.1    |                                                                          |
| 16  | 12416 | 13273 | 858    | 285 | 32.27 (4.46)  | Hypothetical protein    | Hypothetical protein SEP1_015 [ <i>Staphylococcus</i> phage phiIBB-SEP1] (0.0)    | 99% (98%)                   | AGR48144.1    |                                                                          |
| 17  | 13248 | 13469 | 222    | 73  | 8.25 (9.31)   | Hypothetical protein    | Hypothetical protein SEP1_016 [ <i>Staphylococcus</i> phage phiIBB-SEP1] (2e-45)  | 100% (100%)                 | AGR48145.1    |                                                                          |
| 18  | 13489 | 15273 | 1785   | 594 | 65.59 (4.72)  | Major tail sheath       | Tail sheath protein [ <i>Staphylococcus</i> phage phiIBB-SEP1] (0.0)              | 99% (99%)                   | AGR48146.1    | Phage_sheath_1[pfam04984], Phage tail sheath protein (1.83e-05)          |
| 19  | 15333 | 15698 | 366    | 121 | 13.53 (9.04)  | Hypothetical protein    | Hypothetical protein SEP1_018 [ <i>Staphylococcus</i> phage phiIBB-SEP1] (6e-     | 97% (98%)                   | AGR48147.1    |                                                                          |



|    |       |       |      |      |                |                                   |                                                                                              |             |             |                                                                                               |
|----|-------|-------|------|------|----------------|-----------------------------------|----------------------------------------------------------------------------------------------|-------------|-------------|-----------------------------------------------------------------------------------------------|
|    |       |       |      |      |                |                                   | 148)                                                                                         |             |             |                                                                                               |
| 20 | 16510 | 17448 | 939  | 312  | 36.68 (9.42)   | Hypothetical protein              | ORF018 [ <i>Staphylococcus</i> phage Twort] (3e-92)                                          | 50% (66%)   | YP_238556.1 |                                                                                               |
| 21 | 17505 | 17639 | 135  | 44   | 5.45 (11.18)   | Hypothetical protein              | Hypothetical protein SEP1_022 [ <i>Staphylococcus</i> phage phiIBB-SEP1] (5e-19)             | 93% (95%)   | AGR48150.1  |                                                                                               |
| 22 | 17639 | 18100 | 462  | 153  | 18.17 (9.72)   | Hypothetical protein              | Hypothetical protein SEP1_023 [ <i>Staphylococcus</i> phage phiIBB-SEP1] (3e-102)            | 96% (98%)   | AGR48151.1  |                                                                                               |
| 23 | 18105 | 18302 | 198  | 65   | 7.59 (4.55)    | Hypothetical protein              | Hypothetical protein SEP1_024 [ <i>Staphylococcus</i> phage phiIBB-SEP1] (7e-32)             | 97% (98%)   | AGR48152.1  |                                                                                               |
| 24 | 18368 | 18661 | 294  | 97   | 11.69 (5.82)   | Hypothetical protein              | Hypothetical protein SEP1_025 [ <i>Staphylococcus</i> phage phiIBB-SEP1] (4e-60)             | 100% (100%) | AGR48153.1  |                                                                                               |
| 25 | 18787 | 19197 | 411  | 136  | 16.00 (4.53)   | Hypothetical protein              | Hypothetical protein SEP1_026 [ <i>Staphylococcus</i> phage phiIBB-SEP1] (2e-93)             | 100% (100%) | AGR48154.1  |                                                                                               |
| 26 | 19229 | 19738 | 510  | 169  | 20.17 (4.03)   | Hypothetical tail protein         | Hypothetical protein SEP1_027 [ <i>Staphylococcus</i> phage phiIBB-SEP1] (1e-117)            | 100% (100%) | AGR48155.1  |                                                                                               |
| 27 | 19793 | 23110 | 3318 | 1105 | 118.12 (10.11) | Tail lysin                        | Tail lysin [ <i>Staphylococcus</i> phage phiIBB-SEP1] (0.0)                                  | 99% (99%)   | AGR48156.1  | SMC_prok_A[TIGR02169], chromosome segregation protein SMC (7.96e-03)                          |
| 28 | 23855 | 24436 | 582  | 193  | 21.17 (9.72)   | Glucosaminidase                   | Tail lysin [ <i>Staphylococcus</i> phage phiIBB-SEP1] (6e-131)                               | 100% (100%) | AGR48156.1  | Glucosaminidase[pfam01832], Mannosyl-glycoproteinendo-beta-N-acetylglucosaminidase (2.51e-09) |
| 29 | 24499 | 25296 | 798  | 265  | 28.59 (9.34)   | Lytic transglycosylase            | SLT-domain containing protein [ <i>Staphylococcus</i> phage phiIBB-SEP1] (0.0)               | 100% (100%) | AGR48157.1  | SLT[pfam01464], Transglycosylase SLT domain (7.70e-06)                                        |
| 30 | 25353 | 27959 | 2607 | 868  | 98.03 (5.88)   | Amidase                           | Putative N-acetylmuramoyl-L-alanine amidase [ <i>Staphylococcus</i> phage phiIBB-SEP1] (0.0) | 99% (100%)  | AGR48158.1  | CHAP[pfam05257], CHAP domain (1.28e-21)                                                       |
| 31 | 27974 | 28882 | 909  | 302  | 35.68 (4.24)   | Endopeptidase                     | Hypothetical protein SEP1_032 [ <i>Staphylococcus</i> phage phiIBB-SEP1] (0.0)               | 99% (99%)   | AGR48159.1  | IPR000064 Endopeptidase, NLPC/P60 domain(4.1e-05)                                             |
| 32 | 28885 | 31038 | 2154 | 717  | 81.76 (4.63)   | Chromosome segregation protein    | Hypothetical protein SEP1_033 [ <i>Staphylococcus</i> phage phiIBB-SEP1] (0.0)               | 98% (99%)   | AGR48160.1  | PRK01156 chromosome segregation protein (9.17e-05)                                            |
| 33 | 31059 | 31727 | 669  | 222  | 24.91 (4.94)   | Phage-related replication protein | Hypothetical protein SEP1_034 [ <i>Staphylococcus</i> phage phiIBB-SEP1] (5e-158)            | 99% (99%)   | AGR48161.1  | COG4195 Phage-related replication protein (3.31e-47)                                          |
| 34 | 31841 | 32638 | 798  | 265  | 26.69 (9.53)   | Hypothetical protein              | Hypothetical protein SEP1_035 [ <i>Staphylococcus</i> phage phiIBB-SEP1] (0.0)               | 100% (100%) | AGR48162.1  |                                                                                               |
| 35 | 32638 | 33162 | 525  | 174  | 20.54 (5.08)   | Hypothetical protein              | Hypothetical protein SEP1_036 [ <i>Staphylococcus</i> phage phiIBB-SEP1] (2e-120)            | 100% (100%) | AGR48163.1  |                                                                                               |
| 36 | 33162 | 33866 | 705  | 234  | 27.13 (4.72)   | Baseplate wedge subunit           | Baseplate wedge subunit [ <i>Staphylococcus</i> phage phiIBB-SEP1] (1e-160)                  | 93% (99%)   | AGR48164.1  | COG3628[COG3628], Phage baseplate assembly protein W (1.91e-07)                               |

|    |       |       |      |      |               |                             |                                                                                   |             |             |                                                                                                                                                                                                                 |
|----|-------|-------|------|------|---------------|-----------------------------|-----------------------------------------------------------------------------------|-------------|-------------|-----------------------------------------------------------------------------------------------------------------------------------------------------------------------------------------------------------------|
| 37 | 33880 | 34926 | 1047 | 348  | 39.65 (4.69)  | Baseplate J protein         | Baseplate J protein [ <i>Staphylococcus</i> phage phiIBB-SEP1] (0.0)              | 99% (99%)   | AGR48165.1  | Baseplate_J[pfam04865], Baseplate J-like protein (8.10e-05)                                                                                                                                                     |
| 38 | 34943 | 37600 | 2658 | 885  | 102.93 (4.63) | Hypothetical protein        | Hypothetical protein SEP1_039 [ <i>Staphylococcus</i> phage phiIBB-SEP1] (0.0)    | 99% (99%)   | AGR48166.1  |                                                                                                                                                                                                                 |
| 39 | 37724 | 38245 | 522  | 173  | 19.41 (5.67)  | Baseplate protein           | Hypothetical protein SEP1_040 [ <i>Staphylococcus</i> phage phiIBB-SEP1] (5e-123) | 99% (99%)   | AGR48167.1  | Phage-Gp8[pfam09215], Bacteriophage T4, Gp8 (3.48e-03)                                                                                                                                                          |
| 40 | 38266 | 41721 | 3456 | 1151 | 129.16 (5.29) | Tail protein                | Hypothetical protein SEP1_041 [ <i>Staphylococcus</i> phage phiIBB-SEP1] (0.0)    | 98% (99%)   | AGR48168.1  |                                                                                                                                                                                                                 |
| 41 | 41781 | 41933 | 153  | 50   | 5.95 (9.22)   | Hypothetical protein        | Hypothetical protein SEP1_042 [ <i>Staphylococcus</i> phage phiIBB-SEP1] (3e-16)  | 94% (98%)   | AGR48169.1  |                                                                                                                                                                                                                 |
| 42 | 41939 | 43867 | 1929 | 642  | 73.16 (5.06)  | Hypothetical protein        | Hypothetical protein SEP1_043 [ <i>Staphylococcus</i> phage phiIBB-SEP1](0.0)     | 83% (91%)   | AGR48170.1  | PHA01818[PHA01818]                                                                                                                                                                                              |
| 43 | 43880 | 44272 | 393  | 130  | 15.11 (4.22)  | Methyltransferase subunit G | Hypothetical protein SEP1_044 [ <i>Staphylococcus</i> phage phiIBB-SEP1] (4e-76)  | 95% (96%)   | AGR48171.1  | DUF2977[pfam11192], Protein of unknown function (DUF2977) (4.56e-06)<br>PRK01026[PRK01026], tetrahydromethanopterin S-methyltransferase subunit G (8.57e-03)                                                    |
| 44 | 44279 | 45649 | 1371 | 456  | 50.94 (6.50)  | Hypothetical protein        | Hypothetical protein SEP1_045 [ <i>Staphylococcus</i> phage phiIBB-SEP1] (0.0)    | 99% (100%)  | AGR48172.1  | PHA01818[PHA01818], Hypothetical protein (3.54e-116)                                                                                                                                                            |
| 45 | 45741 | 48743 | 3003 | 1000 | 115.97 (7.86) | DNA helicase                | ORF006 [ <i>Staphylococcus</i> phage Twort] (0.0)                                 | 83% (92%)   | YP_238583.1 | HELICc[cd00079], Helicase superfamily c-terminal domain (7.70e-12)<br>Hint[cd00081], Hedgehog/Intein domain (8.98e-12)                                                                                          |
| 46 | 48759 | 50372 | 1614 | 537  | 63.52 (9.26)  | Rep protein                 | Transcriptional regulator [ <i>Staphylococcus</i> phage phiIBB-SEP1] (0.0)        | 98% (99%)   | AGR48174.1  | IPR011991 Winged helix-turn-helix DNA-binding domain (2.2e-05)                                                                                                                                                  |
| 47 | 50386 | 51492 | 1107 | 368  | 43.67 (10.47) | Transposase                 | Transposase [ <i>Staphylococcus</i> phage phiIBB-SEP1] (0.0)                      | 80% (91%)   | AGR48183.1  | OrfB_IS605[pfam01385], Probable transposase (4.42e-10)<br>HTH_OrfB_IS605[pfam12323], Helix-turn-helix domain (1.38e-07)<br>tspaseT_teng_C[TIGR01766], transposase, IS605 OrfB family, central region (1.42e-05) |
| 48 | 51717 | 53117 | 1401 | 466  | 53.76 (5.32)  | Helicase                    | DNA helicase [ <i>Staphylococcus</i> phage phiIBB-SEP1] (0.0)                     | 99% (100%)  | AGR48175.1  | GP4d_helicase[cd01122] (7.91e-06)                                                                                                                                                                               |
| 49 | 53189 | 53494 | 306  | 101  | 11.78 (4.38)  | Hypothetical protein        | Hypothetical protein SEP1_049 [ <i>Staphylococcus</i> phage phiIBB-SEP1] (6e-63)  | 100% (100%) | AGR48176.1  |                                                                                                                                                                                                                 |
| 50 | 53494 | 54057 | 564  | 187  | 22.133 (5.15) | Hypothetical protein        | Hypothetical protein SEP1_050 [ <i>Staphylococcus</i> phage phiIBB-SEP1] (2e-127) | 100% (100%) | AGR48177.1  | PTZ00211[PTZ00211], ribonucleoside-diphosphate reductase small subunit (2.12e-03)                                                                                                                               |
| 51 | 54057 | 55091 | 1035 | 344  | 39.78 (4.86)  | Exonuclease                 | DNA repair exonuclease [ <i>Staphylococcus</i> phage phiIBB-SEP1] (0.0)           | 99% (99%)   | AGR48178.1  | MPP_Mre11_N[cd00840], Mre11 nuclease, N-terminal metallophosphatase domain (1.35e-24)                                                                                                                           |
| 52 | 55169 | 55558 | 390  | 129  | 15.42 (4.66)  | Hypothetical protein        | Hypothetical protein KgORF73                                                      | 81% (93%)   | YP_024503.1 | PHA02275[PHA02275], Hypothetical                                                                                                                                                                                |

|    |       |       |      |     |              |                                            |                                                                                         |             |                |                                                                                                                                                                   |
|----|-------|-------|------|-----|--------------|--------------------------------------------|-----------------------------------------------------------------------------------------|-------------|----------------|-------------------------------------------------------------------------------------------------------------------------------------------------------------------|
|    |       |       |      |     |              |                                            | [ <i>Staphylococcus</i> phage K] (2e-70)                                                |             |                | protein (1.74e-24)                                                                                                                                                |
| 53 | 55551 | 57464 | 1914 | 637 | 73.95 (5.12) | Exonuclease                                | Putative exonuclease [ <i>Staphylococcus</i> phage phiIBB-SEP1] (0.0)                   | 100% (100%) | YP_007677555.1 | ABC_ATPase[cd00267], ATP-binding cassette transporter nucleotide-binding domain (2.14e-05)<br>ABC_sbcCD[cd03279], ATP-binding cassette domain of sbcCD (1.11e-13) |
| 54 | 57471 | 58070 | 600  | 199 | 23.58 (9.51) | Hypothetical protein                       | Hypothetical protein SEP1_054 [ <i>Staphylococcus</i> phage phiIBB-SEP1] (3e-140)       | 100% (100%) | AGR48181.1     |                                                                                                                                                                   |
| 55 | 58082 | 59137 | 1056 | 351 | 40.53 (7.63) | DNA primase                                | Primase [ <i>Staphylococcus</i> phage phiIBB-SEP1] (0.0)                                | 99% (100%)  | AGR48182.1     | TOPRIM_DnaG_primases[cd03364], TOPRIM_DnaG_primases (1.69e-09)<br>ZnF_CHCC[smart00400], zinc finger (1.80e-06)                                                    |
| 56 | 59199 | 59510 | 312  | 103 | 11.92 (3.83) | Hypothetical protein                       | Hypothetical protein SEP1_057 [ <i>Staphylococcus</i> phage phiIBB-SEP1] (6e-64)        | 99% (100%)  | AGR48184.1     |                                                                                                                                                                   |
| 57 | 59510 | 59944 | 435  | 144 | 16.71 (4.69) | Hypothetical protein                       | Hypothetical protein SEP1_058 [ <i>Staphylococcus</i> phage phiIBB-SEP1] (1e-94)        | 100% (100%) | AGR48185.1     | PHA02277[PHA02277], Hypothetical protein (1.96e-08)                                                                                                               |
| 58 | 59937 | 60548 | 612  | 203 | 23.51 (4.81) | Resolvase                                  | Hypothetical protein SEP1_059 [ <i>Staphylococcus</i> phage phiIBB-SEP1] (2e-146)       | 99% (99%)   | YP_240945.1    | COG1591[COG1591], Holliday junction resolvase - archaeal type [DNA replication, recombination, and repair] (7.68e-05)                                             |
| 59 | 60566 | 60964 | 399  | 132 | 15.02 (9.83) | Flavoprotein                               | FlavoproteinNrdI [ <i>Staphylococcus</i> phage phiIBB-SEP1] (2e-90)                     | 100% (100%) | AGR48187.1     | Flavodoxin_NrdI[pfam07972], NrdI<br>Flavodoxin like (1.86e-32)                                                                                                    |
| 60 | 60969 | 62123 | 1155 | 384 | 43.98 (5.13) | Ribonucleotide reductase large subunit     | Ribonucleotide reductase large subunit [ <i>Staphylococcus</i> phage phiIBB-SEP1] (0.0) | 99% (99%)   | AGR48188.1     | RNR_I[cd01679], Class I ribonucleotide reductase (2.84e-71)<br>RNR_N[pfam08343], Ribonucleotide reductase N-terminal (6.97e-22)                                   |
| 61 | 62253 | 62837 | 585  | 194 | 22.36 (9.95) | Group I intron GIY-YIG homing endonuclease | Group I intron endonuclease [ <i>Staphylococcus</i> phage vB_SepS_SEP9] (8e-22)         | 36% (53%)   | AHG24002.1     | GIY-YIG_SegABCDEF [cd10444], N-terminal catalytic GIY-YIG domain of bacteriophage T4 segABCDEF gene encoding proteins (1.05e-10)                                  |
| 62 | 63115 | 64038 | 924  | 307 | 34.73 (5.85) | Ribonucleotide reductase large subunit     | Ribonucleotide reductase large subunit [ <i>Staphylococcus</i> phage phiIBB-SEP1] (0.0) | 100% (100%) | AGR48188.1     | RNR_I[cd01679], Class I ribonucleotide reductase (9.03e-72)                                                                                                       |
| 63 | 64053 | 65099 | 1047 | 348 | 40.76 (4.62) | Ribonucleotide reductase small subunit     | Ribonucleotide reductase beta subunit [ <i>Staphylococcus</i> phage phiIBB-SEP1] (0.0)  | 99% (100%)  | AGR48189.1     | RNR2[cd01049], Ribonucleotide Reductase, R2/beta subunit, ferritin-like diiron-binding domain (2.18e-69)                                                          |
| 64 | 65139 | 65450 | 312  | 103 | 12.11 (4.29) | Hypothetical protein                       | Hypothetical protein SEP1_063 [ <i>Staphylococcus</i> phage phiIBB-SEP1] (3e-66)        | 100% (100%) | AGR48190.1     |                                                                                                                                                                   |
| 65 | 65453 | 65776 | 324  | 107 | 12.11 (4.08) | Thioredoxin-like                           | Thioredoxin-like protein [ <i>Staphylococcus</i> phage phiIBB-SEP1] (7e-68)             | 100% (100%) | AGR48192.1     | TRX_family[cd02947], TRX family (3.35e-07)                                                                                                                        |
| 66 | 65842 | 66567 | 726  | 241 | 28.59 (9.06) | Hypothetical protein                       | Hypothetical protein SEP1_066 [ <i>Staphylococcus</i> phage phiIBB-SEP1] (1e-172)       | 100% (100%) | AGR48193.1     |                                                                                                                                                                   |

|    |       |       |      |     |               |                                        |                                                                                   |             |            |                                                                                                                                               |
|----|-------|-------|------|-----|---------------|----------------------------------------|-----------------------------------------------------------------------------------|-------------|------------|-----------------------------------------------------------------------------------------------------------------------------------------------|
| 67 | 66576 | 66875 | 300  | 99  | 11.85 (5.86)  | DNA binding protein                    | DNA-binding protein [ <i>Staphylococcus</i> phage phiIBB-SEP1] (5e-63)            | 100% (100%) | AGR48194.1 | Bac_DNA_binding [pfam00216], Bacterial DNA-binding protein (1.40e-12)                                                                         |
| 68 | 66956 | 69187 | 2232 | 743 | 86.85 (6.10)  | DNA polymerase                         | DNA polymerase [ <i>Staphylococcus</i> phage phiIBB-SEP1] (0.0)                   | 100% (100%) | AGR48195.1 | DNA_polA_I_Ecoli_like_exo [cd06139] (4.46e-15)<br>35EXOc[smart00474], 3'-5' exonuclease (2.71e-07)<br>UDG_F4_TTUDGA_like [cd10030] (1.17e-03) |
| 69 | 69353 | 70162 | 810  | 269 | 31.39 (10.13) | Group I intron HNH homing endonuclease | HNH endonuclease [ <i>Staphylococcus</i> phage phiIBB-SEP1] (0.0)                 | 99% (100%)  | AGR48196.1 | NUMOD4 [pfam07463], NUMOD4 motif (5.02e-08)                                                                                                   |
| 70 | 70429 | 71271 | 843  | 280 | 32.30 (5.32)  | DNA polymerase                         | DNA polymerase [ <i>Staphylococcus</i> phage phiIBB-SEP1] (0.0)                   | 99% (100%)  | AGR48195.1 | DNA_pol_A_pol_I_C [cd08637] (4.07e-50)                                                                                                        |
| 71 | 71325 | 71807 | 483  | 160 | 18.75 (5.92)  | Hypothetical protein                   | Hypothetical protein SEP1_071 [ <i>Staphylococcus</i> phage phiIBB-SEP1] (1e-112) | 99% (100%)  | AGR48197.1 |                                                                                                                                               |
| 72 | 71898 | 73142 | 1245 | 414 | 47.22 (4.50)  | Hypothetical protein                   | Hypothetical protein SEP1_072 [ <i>Staphylococcus</i> phage phiIBB-SEP1] (0.0)    | 99% (99%)   | AGR48198.1 |                                                                                                                                               |
| 73 | 73200 | 73424 | 225  | 74  | 80.01 (8.66)  | Recombination protein                  | Recombination protein [ <i>Staphylococcus</i> phage phiIBB-SEP1] (9e-40)          | 100% (100%) | AGR48199.1 | SSF52540 P-loop containing nucleoside triphosphate hydrolases (2.7e-07)                                                                       |
| 74 | 73769 | 74737 | 969  | 322 | 38.36 (9.53)  | Intein DOD homing endonuclease         | I-MsaII [ <i>Staphylococcus</i> phage MSA6] (0.0)                                 | 98% (99%)   | AFN38796.1 | IPR004042 Intein DOD homing endonuclease (4.4e-07)                                                                                            |
| 75 | 74885 | 75805 | 921  | 306 | 34.33 (5.20)  | DNA repair protein                     | Recombination protein [ <i>Staphylococcus</i> phage phiIBB-SEP1] (0.0)            | 100% (100%) | AGR48199.1 | recA[cd00983] (2.79e-18)                                                                                                                      |
| 76 | 75802 | 76170 | 369  | 122 | 14.32 (6.37)  | Hypothetical protein                   | Hypothetical protein SEP1_074 [ <i>Staphylococcus</i> phage phiIBB-SEP1] (3e-83)  | 100% (100%) | AGR48200.1 |                                                                                                                                               |
| 77 | 76151 | 76807 | 657  | 218 | 26.09 (5.59)  | Sigma factor                           | Putative sigma factor [ <i>Staphylococcus</i> phage phiIBB-SEP1] (8e-150)         | 99% (99%)   | AGR48201.1 |                                                                                                                                               |
| 78 | 76883 | 77227 | 345  | 114 | 13.03 (10.19) | Holin                                  | Holin [ <i>Staphylococcus</i> phage phiIBB-SEP1] (1e-70)                          | 100% (100%) | AGR48202.1 | Holin_SPP1[TIGR01592], holin, SPP1 family (1.73e-06)                                                                                          |
| 79 | 77244 | 77903 | 660  | 219 | 24.89 (4.40)  | Hypothetical protein                   | Hypothetical protein SEP1_078 [ <i>Staphylococcus</i> phage phiIBB-SEP1] (5e-158) | 100% (100%) | AGR48203.1 | PHA02283[PHA02283], Hypothetical protein (2.59e-80)                                                                                           |
| 80 | 78011 | 78271 | 261  | 86  | 10.13 (5.71)  | Hypothetical protein                   | Hypothetical protein SEP1_079 [ <i>Staphylococcus</i> phage phiIBB-SEP1] (2e-54)  | 98% (100%)  | AGR48204.1 |                                                                                                                                               |
| 81 | 78274 | 79014 | 741  | 246 | 28.97 (5.63)  | Hypothetical protein                   | Hypothetical protein SEP1_080 [ <i>Staphylococcus</i> phage phiIBB-SEP1] (4e-163) | 93% (97%)   | AGR48205.1 | PHA02284[PHA02284], Hypothetical protein (1.81e-21)                                                                                           |
| 82 | 79017 | 80282 | 1266 | 421 | 48.18 (5.71)  | Mre11 nuclease                         | Putative metallophosphatase [ <i>Staphylococcus</i> phage phiIBB-SEP1] (0.0)      | 99% (100%)  | AGR48206.1 | MPP_Mre11_N[cd00840], Mre11 nuclease, N-terminal metallophosphatase domain (2.77e-05)                                                         |
| 83 | 80295 | 80633 | 339  | 112 | 13.11 (9.37)  | Hypothetical protein                   | Hypothetical protein SEP1_082 [ <i>Staphylococcus</i> phage phiIBB-SEP1] (1e-71)  | 99% (100%)  | AGR48207.1 |                                                                                                                                               |

|     |       |       |     |     |               |                      |                                                                                      |             |            |                                                     |
|-----|-------|-------|-----|-----|---------------|----------------------|--------------------------------------------------------------------------------------|-------------|------------|-----------------------------------------------------|
| 84  | 80698 | 81237 | 540 | 179 | 20.64 (8.74)  | Hypothetical protein | Hypothetical protein SEP1_083<br>[ <i>Staphylococcus</i> phage phiIBB-SEP1] (8e-125) | 100% (100%) | AGR48208.1 |                                                     |
| 85  | 81227 | 81976 | 750 | 249 | 29.45 (9.81)  | Hypothetical protein | Hypothetical protein SEP1_084<br>[ <i>Staphylococcus</i> phage phiIBB-SEP1] (0.0)    | 99% (99%)   | AGR48209.1 |                                                     |
| 86  | 81969 | 82382 | 414 | 137 | 16.08 (10.81) | Hypothetical protein | Hypothetical protein SEP1_085<br>[ <i>Staphylococcus</i> phage phiIBB-SEP1] (3e-93)  | 99% (100%)  | AGR48210.1 |                                                     |
| 87  | 82382 | 83227 | 846 | 281 | 32.40 (5.49)  | Hypothetical protein | Hypothetical protein SEP1_086<br>[ <i>Staphylococcus</i> phage phiIBB-SEP1] (0.0)    | 100% (100%) | AGR48211.1 |                                                     |
| 88  | 83311 | 83811 | 501 | 166 | 18.97 (4.16)  | Membrane protein     | Membrane protein [ <i>Staphylococcus</i> phage phiIBB-SEP1] (2e-109)                 | 98% (98%)   | AGR48212.1 |                                                     |
| 89  | 84149 | 84874 | 726 | 241 | 28.15 (5.15)  | Hypothetical protein | Hypothetical protein SEP1_088<br>[ <i>Staphylococcus</i> phage phiIBB-SEP1] (9e-167) | 98% (98%)   | AGR48213.1 |                                                     |
| 90  | 84899 | 85387 | 489 | 162 | 19.04 (4.56)  | Hypothetical protein | Hypothetical protein SEP1_089<br>[ <i>Staphylococcus</i> phage phiIBB-SEP1] (1e-111) | 100% (100%) | AGR48214.1 |                                                     |
| 91  | 85430 | 85870 | 441 | 146 | 17.33 (9.28)  | Hypothetical protein | Hypothetical protein SEP1_090<br>[ <i>Staphylococcus</i> phage phiIBB-SEP1] (7e-98)  | 100% (100%) | AGR48215.1 | IPR009057 Homeodomain-like(1e-05)                   |
| 92  | 85903 | 86604 | 702 | 233 | 26.97 (4.48)  | Hypothetical protein | Hypothetical protein SEP1_091<br>[ <i>Staphylococcus</i> phage phiIBB-SEP1] (8e-165) | 99% (100%)  | AGR48216.1 | PHA02290[PHA02290], Hypothetical protein (1.56e-17) |
| 93  | 86669 | 87052 | 384 | 127 | 14.63 (9.93)  | Membrane protein     | Membrane protein [ <i>Staphylococcus</i> phage phiIBB-SEP1] (3e-69)                  | 90% (98%)   | AGR48217.1 | PHA02291[PHA02291], Hypothetical protein (1.03e-11) |
| 94  | 87189 | 87371 | 183 | 60  | 7.32 (10.34)  | Hypothetical protein | Hypothetical protein SEP1_093<br>[ <i>Staphylococcus</i> phage phiIBB-SEP1] (2e-31)  | 93%(95%)    | AGR48218.1 |                                                     |
| 95  | 87364 | 87645 | 282 | 93  | 10.95 (6.13)  | Hypothetical protein | Hypothetical protein SEP1_094<br>[ <i>Staphylococcus</i> phage phiIBB-SEP1] (5e-58)  | 96% (100%)  | AGR48219.1 |                                                     |
| 96  | 87642 | 87995 | 354 | 117 | 13.95 (10.08) | Hypothetical protein | Hypothetical protein SEP1_096<br>[ <i>Staphylococcus</i> phage phiIBB-SEP1] (9e-28)  | 96% (100%)  | AGR48221.1 |                                                     |
| 97  | 87995 | 88495 | 501 | 166 | 19.42 (5.64)  | Hypothetical protein | Hypothetical protein SEP1_097<br>[ <i>Staphylococcus</i> phage phiIBB-SEP1] (2e-113) | 100% (100%) | AGR48222.1 |                                                     |
| 98  | 88499 | 88822 | 324 | 107 | 12.20 (4.52)  | Hypothetical protein | Hypothetical protein SEP1_098<br>[ <i>Staphylococcus</i> phage phiIBB-SEP1] (2e-63)  | 95% (96%)   | AGR48223.1 |                                                     |
| 99  | 88915 | 89475 | 561 | 186 | 22.05 (9.82)  | Hypothetical protein | Hypothetical protein SEP1_099<br>[ <i>Staphylococcus</i> phage phiIBB-SEP1] (4e-123) | 96% (97%)   | AGR48224.1 |                                                     |
| 100 | 89529 | 89876 | 348 | 115 | 13.20 (10.06) | Membrane protein     | Membrane protein [ <i>Staphylococcus</i> phage                                       | 71% (80%)   | AGR48225.1 |                                                     |

|     |       |       |      |     |              |                      |                                                                                             |             |                |                                                                                                                                                                                                     |
|-----|-------|-------|------|-----|--------------|----------------------|---------------------------------------------------------------------------------------------|-------------|----------------|-----------------------------------------------------------------------------------------------------------------------------------------------------------------------------------------------------|
|     |       |       |      |     |              |                      | phiIBB-SEP1] (4e-48)                                                                        |             |                |                                                                                                                                                                                                     |
| 101 | 89890 | 90117 | 228  | 75  | 8.69 (4.43)  | Hypothetical protein | Hypothetical protein SEP1_101<br>[ <i>Staphylococcus</i> phage phiIBB-SEP1] (7e-46)         | 100% (100%) | AGR48226.1     |                                                                                                                                                                                                     |
| 102 | 90135 | 92471 | 2337 | 778 | 92.03 (6.24) | RNA ligase           | Hypothetical protein SEP1_102<br>[ <i>Staphylococcus</i> phage phiIBB-SEP1] (0.0)           | 99% (99%)   | AGR48227.1     | RNA_lig_T4_1[pfam09511], RNA ligase (2.26e-38)<br>MPP_PPP_family[cd00144], phosphoprotein phosphatases of the metallophosphatase superfamily (5.91e-15)<br>AAA_33[pfam13671], AAA domain (1.49e-23) |
| 103 | 92669 | 92812 | 144  | 47  | 5.49 (4.71)  | Membrane protein     | Membrane protein [ <i>Staphylococcus</i> phage phiIBB-SEP1] (9e-10)                         | 96% (95%)   | AGR48228.1     |                                                                                                                                                                                                     |
| 104 | 92815 | 93621 | 807  | 268 | 29.79 (9.08) | Membrane protein     | Membrane protein [ <i>Staphylococcus</i> phage phiIBB-SEP1] (0.0)                           | 100% (100%) | AGR48229.1     | Band_7[pfam01145], SPFH domain / Band 7 family (1.80e-26)                                                                                                                                           |
| 105 | 93740 | 93928 | 189  | 62  | 6.76 (4.65)  | Membrane protein     | Membrane protein [ <i>Staphylococcus</i> phage phiIBB-SEP1] (2e-29)                         | 100% (100%) | AGR48230.1     |                                                                                                                                                                                                     |
| 106 | 93943 | 94119 | 177  | 58  | 6.89 (4.83)  | Hypothetical protein | Hypothetical protein SEP1_106<br>[ <i>Staphylococcus</i> phage phiIBB-SEP1] (7e-30)         | 98% (98%)   | AGR48231.1     |                                                                                                                                                                                                     |
| 107 | 94135 | 94644 | 510  | 169 | 19.96 (9.90) | Hypothetical protein | Hypothetical protein SEP1_107<br>[ <i>Staphylococcus</i> phage phiIBB-SEP1] (8e-116)        | 98% (99%)   | AGR48232.1     |                                                                                                                                                                                                     |
| 108 | 94698 | 95807 | 1110 | 369 | 43.41 (7.99) | Hypothetical protein |                                                                                             |             |                |                                                                                                                                                                                                     |
| 109 | 95883 | 96077 | 195  | 64  | 7.78 (10.02) | Hypothetical protein | Hypothetical protein PhageK_209<br>[ <i>Staphylococcus</i> phage K] (0.38)                  | 50% (78%)   | AHB80124.1     |                                                                                                                                                                                                     |
| 110 | 96110 | 96619 | 510  | 169 | 20.24 (5.16) | Hypothetical protein |                                                                                             |             |                |                                                                                                                                                                                                     |
| 111 | 96649 | 96816 | 168  | 55  | 6.14 (4.43)  | Hypothetical protein |                                                                                             |             |                |                                                                                                                                                                                                     |
| 112 | 96951 | 97259 | 309  | 102 | 11.85 (5.51) | Hypothetical protein |                                                                                             |             |                |                                                                                                                                                                                                     |
| 113 | 97286 | 97447 | 162  | 53  | 6.32 (5.02)  | Hypothetical protein | Hypothetical protein PhageK_209<br>[ <i>Staphylococcus</i> phage K] (4e-06)                 | 46% (72%)   | AHB80124.1     | UPF0182[pfam03699], Uncharacterized protein family (UPF0182) (6.06e-03)                                                                                                                             |
| 114 | 97463 | 97969 | 507  | 168 | 19.72 (4.44) | Hypothetical protein | Hypothetical protein<br>[ <i>Paenibacilluspolymyxa</i> ] (1e-11)                            | 28% (53%)   | WP_019687640.1 |                                                                                                                                                                                                     |
| 115 | 97996 | 98232 | 237  | 78  | 9.16 (4.65)  | Hypothetical protein | Hypothetical protein IPLA7_0054<br>[ <i>Staphylococcus</i> phage vB_SepiS-phiIPLA7] (1e-44) | 91% (93%)   | YP_006561216.1 |                                                                                                                                                                                                     |
| 116 | 98256 | 98666 | 411  | 136 | 15.76 (8.46) | Membrane protein     | Membrane protein [ <i>Staphylococcus</i> phage vB_SepS_SEP9] (9e-52)                        | 89% (90%)   | YP_009007710.1 |                                                                                                                                                                                                     |
| 117 | 98672 | 99208 | 537  | 178 | 21.08 (4.92) | Hypothetical protein | Hypothetical protein SEP1_108<br>[ <i>Staphylococcus</i> phage phiIBB-SEP1] (2e-109)        | 87% (94%)   | AGR48234.1     |                                                                                                                                                                                                     |
| 118 | 99224 | 99424 | 201  | 66  | 7.82 (5.14)  | Hypothetical protein | Hypothetical protein SEP1_109<br>[ <i>Staphylococcus</i> phage phiIBB-SEP1] (1e-39)         | 100% (100%) | AGR48235.1     |                                                                                                                                                                                                     |
| 119 | 99450 | 99707 | 258  | 85  | 9.89 (5.53)  | Hypothetical protein | Hypothetical protein SEP1_110                                                               | 99% (100%)  | AGR48236.1     |                                                                                                                                                                                                     |

|     |        |        |     |     |              |                      |                                                                                              |             |                |                                          |
|-----|--------|--------|-----|-----|--------------|----------------------|----------------------------------------------------------------------------------------------|-------------|----------------|------------------------------------------|
|     |        |        |     |     |              |                      | [ <i>Staphylococcus</i> phage phiIBB-SEP1] (2e-53)                                           |             |                |                                          |
| 120 | 99709  | 100209 | 501 | 166 | 19.28 (5.92) | Membrane protein     | Membrane protein [ <i>Staphylococcus</i> phage phiIBB-SEP1] (2e-106)                         | 97% (98%)   | AGR48237.1     |                                          |
| 121 | 100220 | 100609 | 390 | 129 | 14.38 (5.51) | Membrane protein     | Membrane protein [ <i>Staphylococcus</i> phage vB_SepS_SEP9] (3e-53)                         | 73% (87%)   | YP_009007709.1 |                                          |
| 122 | 100699 | 101094 | 396 | 131 | 15.57 (4.47) | YopX                 | Phage conserved Hypothetical protein TIGR01671 [ <i>Staphylococcus epidermidis</i> ] (5e-44) | 64% (72%)   | WP_002504181.1 | YopX [pfam09643], YopXprotein (4.94e-24) |
| 123 | 101095 | 101412 | 318 | 105 | 12.29 (5.03) | Hypothetical protein | Hypothetical protein, partial [ <i>Staphylococcus aureus</i> ] (1e-23)                       | 54% (73%)   | WP_000193480.1 |                                          |
| 124 | 101502 | 101795 | 294 | 97  | 11.31 (5.02) | Hypothetical protein | Hypothetical protein SEP1_112 [ <i>Staphylococcus</i> phage phiIBB-SEP1] (2e-62)             | 98% (97%)   | AGR48238.1     |                                          |
| 125 | 101816 | 102034 | 219 | 72  | 8.61 (4.28)  | Hypothetical protein | Hypothetical protein SEP1_113 [ <i>Staphylococcus</i> phage phiIBB-SEP1] (8e-40)             | 96% (97%)   | AGR48239.1     |                                          |
| 126 | 102038 | 102253 | 216 | 71  | 8.35 (4.42)  | Hypothetical protein | Hypothetical protein SEP1_114 [ <i>Staphylococcus</i> phage phiIBB-SEP1] (2e-43)             | 100% (100%) | AGR48240.1     |                                          |
| 127 | 102297 | 102650 | 354 | 117 | 13.28 (4.85) | Hypothetical protein | Hypothetical protein SEP1_115 [ <i>Staphylococcus</i> phage phiIBB-SEP1] (9e-80)             | 99% (100%)  | AGR48241.1     |                                          |
| 128 | 102679 | 103077 | 399 | 132 | 15.19 (4.88) | Hypothetical protein | Hypothetical protein SEP1_116 [ <i>Staphylococcus</i> phage phiIBB-SEP1] (5e-91)             | 99% (99%)   | AGR48242.1     |                                          |
| 129 | 103131 | 103334 | 204 | 67  | 8.10 (9.83)  | Hypothetical protein | Hypothetical protein [ <i>Staphylococcus epidermidis</i> ] (2e-39)                           | 99% (100%)  | WP_002469455.1 |                                          |
| 130 | 103346 | 103615 | 270 | 89  | 10.61 (5.73) | Hypothetical protein | Hypothetical protein SEP9_088 [ <i>Staphylococcus</i> phage vB_SepS_SEP9] (4e-49)            | 91% (95%)   | YP_009007756.1 |                                          |
| 131 | 103627 | 104040 | 414 | 137 | 16.00 (4.65) | Hypothetical protein | Hypothetical protein SEP1_120 [ <i>Staphylococcus</i> phage phiIBB-SEP1] (4e-77)             | 85% (94%)   | AGR48246.1     |                                          |
| 132 | 104272 | 104673 | 402 | 133 | 16.02 (9.87) | Hypothetical protein |                                                                                              |             |                |                                          |
| 133 | 104686 | 104886 | 201 | 66  | 7.63 (9.20)  | Hypothetical protein | Hypothetical protein SEP9_038 [ <i>Staphylococcus</i> phage vB_SepS_SEP9] (2e-34)            | 92% (98%)   | YP_009007708.1 |                                          |
| 134 | 104918 | 105334 | 417 | 138 | 16.42 (4.50) | Hypothetical protein | Hypothetical protein SEP1_122 [ <i>Staphylococcus</i> phage phiIBB-SEP1] (3e-90)             | 97% (98%)   | AGR48248.1     |                                          |
| 135 | 105337 | 105573 | 237 | 78  | 9.31 (4.19)  | Hypothetical protein | Hypothetical protein SEP1_123 [ <i>Staphylococcus</i> phage phiIBB-SEP1] (9e-47)             | 99% (100%)  | AGR48249.1     |                                          |
| 136 | 105589 | 106032 | 444 | 147 | 17.63 (9.81) | Hypothetical protein | Hypothetical protein SEP1_124                                                                | 88% (93%)   | AGR48250.1     |                                          |

|            |        |        |     |     |              |                             |                                                                                     |             |            |                                         |
|------------|--------|--------|-----|-----|--------------|-----------------------------|-------------------------------------------------------------------------------------|-------------|------------|-----------------------------------------|
|            |        |        |     |     |              |                             | [ <i>Staphylococcus</i> phage phiIBB-SEP1] (3e-87)                                  |             |            |                                         |
| <b>137</b> | 106051 | 106389 | 339 | 112 | 13.04 (4.58) | Hypothetical protein        |                                                                                     |             |            |                                         |
| <b>138</b> | 106410 | 106853 | 444 | 147 | 17.46 (5.39) | Hypothetical protein        | Hypothetical protein SEP1_126<br>[ <i>Staphylococcus</i> phage phiIBB-SEP1] (3e-88) | 90% (94%)   | AGR48252.1 |                                         |
| <b>139</b> | 106867 | 107259 | 393 | 130 | 15.53 (7.32) | Hypothetical protein        |                                                                                     |             |            |                                         |
| <b>140</b> | 108656 | 108390 | 267 | 88  | 10.26 (4.14) | Hypothetical protein        | Hypothetical protein SEP1_131<br>[ <i>Staphylococcus</i> phage phiIBB-SEP1] (3e-52) | 98%/98%     | AGR48257.1 |                                         |
| <b>141</b> | 108935 | 108675 | 261 | 86  | 9.87 (4.09)  | Hypothetical protein        | Hypothetical protein SEP1_132<br>[ <i>Staphylococcus</i> phage phiIBB-SEP1] (4e-52) | 100% (100%) | AGR48258.1 |                                         |
| <b>142</b> | 109349 | 109011 | 339 | 112 | 13.50 (4.21) | Hypothetical protein        | Hypothetical protein SEP1_133<br>[ <i>Staphylococcus</i> phage phiIBB-SEP1] (2e-54) | 84% (84%)   | AGR48259.1 |                                         |
| <b>143</b> | 109491 | 110165 | 675 | 224 | 25.45 (4.54) | Pentapeptide repeat protein | Pentapeptide repeat protein [Staphylococcus phage phiIBB-SEP1] (3e-140)             | 92% (92%)   | AGR48263.1 | IPR001646 Pentapeptide repeat (3.3e-08) |
| <b>144</b> | 110252 | 110596 | 345 | 114 | 13.53 (5.08) | Hypothetical protein        | Hypothetical protein SEP1_137<br>[ <i>Staphylococcus</i> phage phiIBB-SEP1] (3e-71) | 98% (100%)  | AGR48264.1 |                                         |
| <b>145</b> | 110738 | 111073 | 336 | 111 | 13.30 (8.88) | Hypothetical protein        | Hypothetical protein SEP1_138<br>[ <i>Staphylococcus</i> phage phiIBB-SEP1] (1e-69) | 100% (100%) | AGR48265.1 |                                         |
| <b>146</b> | 111098 | 111298 | 201 | 66  | 7.84 (4.51)  | Hypothetical protein        | Hypothetical protein SEP1_139<br>[ <i>Staphylococcus</i> phage phiIBB-SEP1] (1e-35) | 100% (100%) | AGR48266.1 |                                         |
| <b>147</b> | 112349 | 112149 | 201 | 66  | 7.83 (10.58) | Hypothetical protein        | Hypothetical protein SEP1_142<br>[ <i>Staphylococcus</i> phage phiIBB-SEP1] (1e-32) | 98% (100%)  | AGR48269.1 |                                         |
| <b>148</b> | 112603 | 112382 | 222 | 73  | 8.62 (5.04)  | Hypothetical protein        | Hypothetical protein SEP1_143<br>[ <i>Staphylococcus</i> phage phiIBB-SEP1] (9e-47) | 100% (100%) | AGR48270.1 |                                         |
| <b>149</b> | 113189 | 113497 | 309 | 102 | 11.71 (5.08) | Hypothetical protein        | Hypothetical protein SEP1_144<br>[ <i>Staphylococcus</i> phage phiIBB-SEP1] (7e-67) | 100% (100%) | AGR48271.1 |                                         |
| <b>150</b> | 113700 | 113981 | 282 | 93  | 10.92 (5.73) | TreK                        | Hypothetical protein SEP1_145<br>[ <i>Staphylococcus</i> phage phiIBB-SEP1] (9e-51) | 90% (91%)   | AGR48272.1 |                                         |
| <b>151</b> | 114031 | 114303 | 273 | 90  | 10.47 (4.35) | Hypothetical protein        |                                                                                     |             |            |                                         |
| <b>152</b> | 114979 | 115110 | 132 | 43  | 5.09 (10.36) | TreO                        | Hypothetical protein SEP1_146<br>[ <i>Staphylococcus</i> phage phiIBB-SEP1] (1e-20) | 98% (100%)  | AGR48273.1 |                                         |
| <b>153</b> | 115176 | 115316 | 141 | 46  | 5.61 (4.53)  | Hypothetical protein        | Hypothetical protein SEP1_147<br>[ <i>Staphylococcus</i> phage phiIBB-SEP1] (5e-    | 100% (100%) | AGR48274.1 |                                         |



|     |        |        |      |     |              |                         |                                                                                      |             |                |                                               |  |
|-----|--------|--------|------|-----|--------------|-------------------------|--------------------------------------------------------------------------------------|-------------|----------------|-----------------------------------------------|--|
|     |        |        |      |     |              |                         | 19)                                                                                  |             |                |                                               |  |
| 154 | 115396 | 115635 | 240  | 79  | 9.13 (7.96)  | Hypothetical protein    | Hypothetical protein SEP1_148<br>[ <i>Staphylococcus</i> phage phiIBB-SEP1 (2e-49)]  | 100% (100%) | AGR48275.1     |                                               |  |
| 155 | 115639 | 115785 | 147  | 48  | 5.42 (9.61)  | TreN                    | Membrane protein [ <i>Staphylococcus</i> phage phiIBB-SEP1] (1e-23)                  | 100% (100%) | AGR48276.1     |                                               |  |
| 156 | 115953 | 116282 | 330  | 109 | 13.11 (3.70) | Hypothetical protein    | Hypothetical protein SEP1_151<br>[ <i>Staphylococcus</i> phage phiIBB-SEP1 (7e-66)]  | 96% (97%)   | AGR48278.1     |                                               |  |
| 157 | 116456 | 116719 | 264  | 87  | 10.46 (4.12) | Tre protein             | Hypothetical protein SEP1_152<br>[ <i>Staphylococcus</i> phage phiIBB-SEP1 (1e-52)]  | 100% (100%) | AGR48279.1     |                                               |  |
| 158 | 116791 | 117264 | 474  | 157 | 18.53 (3.60) | Hypothetical protein    | Hypothetical protein SEP1_153<br>[ <i>Staphylococcus</i> phage phiIBB-SEP1 (2e-102)] | 99% (98%)   | AGR48280       |                                               |  |
| 159 | 117376 | 117645 | 270  | 89  | 10.44 (4.94) | Hypothetical protein    |                                                                                      |             |                |                                               |  |
| 160 | 117704 | 117841 | 138  | 45  | 5.18 (4.32)  | Hypothetical protein    | Hypothetical protein SEP1_154<br>[ <i>Staphylococcus</i> phage phiIBB-SEP1] (7e-19)  | 91% (95%)   | AGR48281.1     |                                               |  |
| 161 | 117911 | 118189 | 279  | 92  | 11.18 (3.87) | Hypothetical protein    | Hypothetical protein SEP1_155<br>[ <i>Staphylococcus</i> phage phiIBB-SEP1] (4e-31)  | 93% (96%)   | AGR48282.1     |                                               |  |
| 162 | 118527 | 119954 | 1428 | 475 | 56.41 (9.26) | Hypothetical protein    | Hypothetical protein SEP1_156<br>[ <i>Staphylococcus</i> phage phiIBB-SEP1] (0.0)    | 98% (98%)   | YP_007005520.1 |                                               |  |
| 163 | 120441 | 120013 | 429  | 142 | 16.49 (4.18) | Hypothetical protein    | ORF062 [ <i>Staphylococcus</i> phage Twort] (4e-11)                                  | 31% (56%)   | YP_238669.1    |                                               |  |
| 164 | 121022 | 120516 | 507  | 168 | 20.44 (4.76) | Hypothetical protein    | Hypothetical protein SEP1_157<br>[ <i>Staphylococcus</i> phage phiIBB-SEP1 (5e-103)] | 99% (100%)  | AGR48284.1     |                                               |  |
| 165 | 121335 | 121081 | 255  | 84  | 10.34 (4.59) | BofL                    | Hypothetical protein SEP1_158<br>[ <i>Staphylococcus</i> phage phiIBB-SEP1 (1e-51)]  | 99% (98%)   | AGR48285.1     |                                               |  |
| 166 | 121922 | 121338 | 585  | 194 | 23.29 (4.81) | Hypothetical protein    | Hypothetical protein SEP1_159<br>[ <i>Staphylococcus</i> phage phiIBB-SEP1 (1e-129)] | 98% (98%)   | AGR48286.1     |                                               |  |
| 167 | 122270 | 121962 | 309  | 102 | 12.19 (8.65) | Hypothetical protein    | Hypothetical protein SEP1_161<br>[ <i>Staphylococcus</i> phage phiIBB-SEP1] (3e-66)] | 97% (98%)   | AGR48288.1     |                                               |  |
| 168 | 122721 | 122359 | 363  | 120 | 14.19 (5.06) | Staphylococcal nuclease | Nuclease [ <i>Staphylococcus</i> phage phiIBB-SEP1] (2e-81)]                         | 100% (100%) | AGR48289.1     | Staphylococcal nuclease homologues (1.40e-16) |  |
| 169 | 123080 | 122802 | 279  | 92  | 9.67 (4.03)  | Tail protein            | Hypothetical protein SEP1_163<br>[ <i>Staphylococcus</i> phage phiIBB-SEP1] (4e-57)] | 100% (100%) | AGR48290.1     |                                               |  |
| 170 | 124126 | 123548 | 579  | 192 | 22.38 (4.63) | Hypothetical protein    | Hypothetical protein SEP1_164<br>[ <i>Staphylococcus</i> phage phiIBB-SEP1] (1e-     | 100% (100%) | AGR48291.1     |                                               |  |

|     |        |        |     |     |               |                                      |                                                                                             |             |                |                                                                            |
|-----|--------|--------|-----|-----|---------------|--------------------------------------|---------------------------------------------------------------------------------------------|-------------|----------------|----------------------------------------------------------------------------|
|     |        |        |     |     |               |                                      | 136)                                                                                        |             |                |                                                                            |
| 171 | 124487 | 124146 | 342 | 113 | 26.48 (10.25) | Tail protein                         | Hypothetical protein SEP1_165<br>[ <i>Staphylococcus</i> phage phiIBB-SEP1] (8e-74)         | 100% (100%) | AGR48292.1     |                                                                            |
| 172 | 125186 | 124503 | 684 | 227 | 15.62 (10.16) | GIY-YIG homing endonuclease          | Intron-associated endonuclease<br>[ <i>Staphylococcus</i> phage vB_SepS_SEP9] (2e-22)       | 41% (61%)   | YP_009007670.1 | SSF82771 GIY-YIG endonuclease (1.5e-11)                                    |
| 173 | 125347 | 125186 | 162 | 53  | 6.39 (10.63)  | Resolvase                            | Resolvase [ <i>Lactobacillusequi</i> ] (3e-15)                                              | 66% (86%)   | WP_023859949.1 | IPR000551 MerR-type HTH domain (1.3e-10)                                   |
| 174 | 126136 | 125474 | 663 | 220 | 23.67 (6.27)  | Transglycosylase                     | Transglycosylase-like domain protein<br>[ <i>Staphylococcus</i> phage phiIBB-SEP1] (1e-155) | 97% (98%)   | AGR48293.1     | IPR008258 Lytic transglycosylase-like SLT domain (1.1e-07)                 |
| 175 | 126411 | 126259 | 153 | 50  | 5.86 (5.76)   | RinB                                 | Transcriptional activator RinB<br>[ <i>Staphylococcus</i> phage phiIBB-SEP1] (9e-22)        | 90% (94%)   | AGR48294.1     |                                                                            |
| 176 | 126732 | 126415 | 318 | 105 | 12.50 (5.69)  | Hypothetical protein                 | Hypothetical protein SEP1_168<br>[ <i>Staphylococcus</i> phage phiIBB-SEP1] (1e-63)         | 93% (97%)   | AGR48295.1     |                                                                            |
| 177 | 127141 | 126725 | 417 | 138 | 16.24 (5.13)  | Hypothetical protein                 | Hypothetical protein SEP1_169<br>[ <i>Staphylococcus</i> phage phiIBB-SEP1] (4e-91)         | 99% (100%)  | AGR48296.1     | IPR021739 Bacteriophage T7, Gp1.7 (1.8e-08)                                |
| 178 | 127566 | 127264 | 303 | 100 | 10.99 (4.68)  | NTP pyrophosphohydrolase             | Pyrophosphatase [ <i>Solibacillus silvestris</i> StLB046] (8e-39)                           | 67% (82%)   | YP_006461979.1 | IPR004518 NTP pyrophosphohydrolase MazG, putative catalytic core (1.5e-07) |
| 179 | 127780 | 127613 | 168 | 55  | 6.57 (4.99)   | Hypothetical protein                 | Hypothetical protein SEP1_172<br>[ <i>Staphylococcus</i> phage phiIBB-SEP1] (2e-29)         | 96% (100%)  | AGR48299.1     |                                                                            |
| 180 | 128169 | 127903 | 267 | 88  | 9.95 (5.13)   | Hypothetical protein                 | Hypothetical protein SEP1_173<br>[ <i>Staphylococcus</i> phage phiIBB-SEP1] (6e-41)         | 94% (98%)   | AGR48300.1     |                                                                            |
| 181 | 128785 | 128150 | 636 | 211 | 23.63 (9.63)  | Membrane protein                     | Membrane protein [ <i>Staphylococcus</i> phage phiIBB-SEP1] (3e-138)                        | 97% (99%)   | AGR48301.1     |                                                                            |
| 182 | 129158 | 128856 | 303 | 100 | 11.25 (9.15)  | Membrane protein                     | Membrane protein [ <i>Staphylococcus</i> phage phiIBB-SEP1] (2e-59)                         | 93% (97%)   | AGR48302.1     |                                                                            |
| 183 | 129777 | 129160 | 618 | 205 | 23.37 (4.21)  | Nucleoside-2-deoxyribosyltransferase | nucleoside 2-deoxyribosyltransferase<br>[ <i>Staphylococcus</i> phage phiIBB-SEP1] (3e-80)  | 63% (74%)   | AGR48303.1     | IPR007710 Nucleoside 2-deoxyribosyltransferase (2.8e-16)                   |
| 184 | 130051 | 129791 | 261 | 86  | 9.84 (10.13)  | Membrane protein                     | Membrane protein [ <i>Staphylococcus</i> phage phiIBB-SEP1] (7e-34)                         | 69% (79%)   | AGR48305.1     |                                                                            |
| 185 | 130308 | 130066 | 243 | 80  | 9.73 (6.74)   | Hypothetical protein                 | Hypothetical protein SEP9_060<br>[ <i>Staphylococcus</i> phage vB_SepS_SEP9] (6e-47)        | 98% (100%)  | YP_009007729.1 |                                                                            |
| 186 | 131139 | 130363 | 777 | 258 | 31.03 (9.86)  | HNH homing endonuclease              | HNH endonuclease [ <i>Staphylococcus</i> phage vB_SepS_SEP9] (3e-179)                       | 97% (98%)   | YP_009007730.1 | HNH_3[pfam13392], HNH endonuclease (7.35e-03)                              |
| 187 | 131879 | 131151 | 729 | 242 | 27.83 (5.29)  | PhoH-related protein                 | PhoH-related protein [ <i>Staphylococcus</i> phage vB_SepS_SEP9] (1e-169)                   | 94% (97%)   | YP_009007731.1 | IPR003714 PhoH-like protein (2.3e-25)                                      |

|     |        |        |      |     |              |                           |                                                                                          |             |                |                                                                                                                                                                   |
|-----|--------|--------|------|-----|--------------|---------------------------|------------------------------------------------------------------------------------------|-------------|----------------|-------------------------------------------------------------------------------------------------------------------------------------------------------------------|
| 188 | 132419 | 131907 | 513  | 170 | 19.55 (4.63) | Hypothetical protein      | Hypothetical protein SEP1_181<br>[ <i>Staphylococcus</i> phage phiIBB-SEP1] (5e-114)     | 99% (99%)   | AGR48308.1     |                                                                                                                                                                   |
| 189 | 132850 | 132434 | 417  | 138 | 15.81 (8.99) | Ribonuclease H            | Ribonuclease H [ <i>Staphylococcus</i> phage phiIBB-SEP1] (3e-94)                        | 100% (100%) | AGR48309.1     | RNase_HI_bacteria_HBD[cd09277], Bacterial RNase HI containing a hybrid binding domain (HBD) at the N-terminus (2.36e-41)                                          |
| 190 | 133028 | 132840 | 189  | 62  | 7.33 (9.16)  | Hypothetical protein      | Hypothetical protein SEP1_183<br>[ <i>Staphylococcus</i> phage phiIBB-SEP1] (2e-35)      | 100% (100%) | AGR48310.1     |                                                                                                                                                                   |
| 191 | 133647 | 133051 | 597  | 198 | 22.72 (4.11) | Hypothetical protein      | Hypothetical protein SEP1_184<br>[ <i>Staphylococcus</i> phage phiIBB-SEP1] (1e-129)     | 99% (98%)   | AGR48311.1     |                                                                                                                                                                   |
| 192 | 133861 | 133640 | 222  | 73  | 8.70 (5.38)  | Transcriptional regulator | Putative transcriptional regulator<br>[ <i>Staphylococcus</i> phage phiIBB-SEP1] (2e-41) | 99% (98%)   | AGR48312.1     | IPR001387 Cro/C1-type helix-turn-helix domain (3.8e-13)                                                                                                           |
| 193 | 134092 | 133871 | 222  | 73  | 8.80 (10.41) | Hypothetical protein      | Hypothetical protein SEP1_186<br>[ <i>Staphylococcus</i> phage phiIBB-SEP1] (5e-33)      | 97% (100%)  | AGR48313.1     |                                                                                                                                                                   |
| 194 | 135717 | 134263 | 1455 | 484 | 55.01 (9.78) | Endolysin                 | Endolysin [ <i>Staphylococcus</i> phage phiIBB-SEP1] (0.0)                               | 99% (99%)   | AGR48314.1     | Amidase_2[pfam01510], N-acetylmuramoyl-L-alanineamidase (1.68e-14)<br>CHAP[pfam05257], CHAP domain (2.70e-24)<br>H3_5[pfam08460], Bacterial SH3 domain (1.01e-10) |
| 195 | 136280 | 135720 | 561  | 186 | 20.03 (4.27) | Holin                     | Holin [ <i>Staphylococcus</i> phage phiIBB-SEP1] (8e-128)                                | 99% (100%)  | AGR48316       | Phage_holin_1[pfam04531], Bacteriophage holin (1.18e-19)                                                                                                          |
| 196 | 136958 | 136593 | 366  | 121 | 14.08 (9.98) | Hypothetical protein      | Hypothetical protein SEP9_085<br>[ <i>Staphylococcus</i> phage vB_SepS_SEP9] (3e-59)     | 77% (89%)   | YP_009007753.1 |                                                                                                                                                                   |
| 197 | 138169 | 137948 | 222  | 73  | 9.02 (10.09) | Hypothetical protein      | Hypothetical protein SEP1_194<br>[ <i>Staphylococcus</i> phage phiIBB-SEP1] (1e-45)      | 99% (100%)  | AGR48320.1     |                                                                                                                                                                   |
| 198 | 138833 | 138624 | 210  | 69  | 78.97 (7.74) | Hypothetical protein      | Hypothetical protein SEP1_196<br>[ <i>Staphylococcus</i> phage phiIBB-SEP1] (2e-41)      | 100% (100%) | AGR48322.1     |                                                                                                                                                                   |
| 199 | 139176 | 138844 | 333  | 110 | 12.82 (4.73) | Hypothetical protein      | Hypothetical protein SEP1_197<br>[ <i>Staphylococcus</i> phage phiIBB-SEP1] (2e-67)      | 99% (100%)  | AGR48323.1     |                                                                                                                                                                   |
| 200 | 139513 | 139187 | 327  | 108 | 12.72 (6.51) | Hypothetical protein      | Hypothetical protein SEP1_198<br>[ <i>Staphylococcus</i> phage phiIBB-SEP1] (2e-67)      | 98% (99%)   | AGR48324.1     |                                                                                                                                                                   |
| 201 | 139924 | 140283 | 360  | 119 | 13.97 (5.42) | Membrane protein          | Membrane protein [ <i>Staphylococcus</i> phage phiIBB-SEP1] (2e-75)                      | 99% (100%)  | AGR48326.1     |                                                                                                                                                                   |

|            |        |        |     |     |               |                      |                                                                                     |            |            |  |
|------------|--------|--------|-----|-----|---------------|----------------------|-------------------------------------------------------------------------------------|------------|------------|--|
| <b>202</b> | 140264 | 140527 | 264 | 87  | 10.01 (10.19) | Membrane protein     | Hypothetical protein SEP1_200<br>[ <i>Staphylococcus</i> phage phiIBB-SEP1] (2e-55) | 99% (100%) | AGR48327.1 |  |
| <b>203</b> | 140532 | 140951 | 420 | 139 | 15.67 (4.08)  | Hypothetical protein | Hypothetical protein SEP1_201<br>[ <i>Staphylococcus</i> phage phiIBB-SEP1] (3e-92) | 99% (100%) | AGR48328.1 |  |

**Table S2:** Features of bacteriophage phiIPLA-C1C *orfs*, gene products (gp) and functional assignments.

| Promoter            | Strand | Sequence                               | Nt position   | Spacer | TG | Gene   |
|---------------------|--------|----------------------------------------|---------------|--------|----|--------|
| <b>phiIPLA-RODI</b> |        |                                        |               |        |    |        |
| P1                  | -      | <u>TTGACATTCTAATTAATATCCTTTATACT</u>   | 1964-1992     | 17     | -  | Orf5   |
| P2                  | -      | <u>TTGACTTTTTTTACTAAGTATGGTAAGAT</u>   | 6909-6937     | 17     | +  | Orf16  |
| P3                  | -      | <u>TTGACAAAATAGAAAAAGTAGGTATAGT</u>    | 11380-11408   | 17     | +  | Orf25  |
| P4                  | -      | <u>TTGACAAATGAAAATACTTGTATTATAAT</u>   | 15732-15760   | 17     | -  | Orf33  |
| P5                  | -      | <u>TTGACAAATATGACTTACTATGATATGAT</u>   | 19495-19523   | 17     | +  | Orf39  |
| P6                  | -      | <u>TTGACAAACCTCCTTAGTTATGGTATACT</u>   | 22318-22346   | 17     | +  | Orf45  |
| P7                  | -      | <u>TTGACTTCATAAGTTAACTATGCTATAAT</u>   | 25531-25559   | 17     | +  | Orf52  |
| P8                  | -      | <u>TTGACAAAATTAATACATAGTGTATAGT</u>    | 27631-27659   | 17     | +  | Orf55  |
| P9                  | -      | <u>TTGACTTATTTATCAATATAGTATATAGT</u>   | 32469-32497   | 17     | -  | Orf60  |
| P10*                | +      | <u>TTGACCTATTATTTCTAGAAGCTTTTAGATT</u> | 34122-34151   | 18     | -  | Orf64  |
| P11                 | +      | <u>TTGACAAATTAATAACTAATAAATTATAAT</u>  | 55708-55736   | 17     | -  | Orf91  |
| P12                 | +      | <u>TTGACAGAAAGTTAATAATATGGTATACT</u>   | 73596-73624   | 17     | +  | Orf103 |
| P13                 | +      | <u>TTGACTTAGGGAGCATTATGTGGTATACT</u>   | 81631-81659   | 17     | +  | Orf109 |
| P14                 | +      | <u>TTGACATTTTATATGTTAGGTGGTATAAT</u>   | 86518-86546   | 17     | +  | Orf112 |
| P15                 | +      | <u>TTGACAAGATTTAAAATATATGGTATAGT</u>   | 98834-98862   | 17     | +  | Orf128 |
| P16                 | +      | <u>TTGACAATATGTTTAACTTATGTTATACT</u>   | 102120-102148 | 17     | +  | Orf129 |
| P17                 | +      | <u>TTGACAAATATAAAAACTATGTTATAAT</u>    | 102944-102972 | 17     | +  | Orf131 |
| P18                 | +      | <u>TTGACAAGAACAATAAGTGTAGTATAGT</u>    | 118027-118055 | 17     | -  | Orf154 |
| P19                 | +      | <u>TTGACAAATCATTTTATATAGTGTATAGT</u>   | 118747-118775 | 17     | -  | Orf157 |
| P20                 | +      | <u>TTGACACTTCTAAACTTTTGTATTATACT</u>   | 121451-121479 | 17     | -  | Orf165 |
| P21                 | +      | <u>TTGACAAATGAGTGTGCATAGGTTATACT</u>   | 122469-122497 | 17     | -  | Orf168 |
| P22                 | +      | <u>TTGACAAAGGGAGTTTTTTATTTGATAGT</u>   | 126557-126585 | 17     | +  | Orf175 |
| P23                 | +      | <u>TTTACATTTAGTAAGTAATATGGTAATATT</u>  | 127212-127241 | 18     | -  | Orf177 |
| P24                 | +      | <u>TTGACAACGAAGGAAACATGTAGTATAGT</u>   | 128429-128457 | 17     | -  | Orf181 |
| P25                 | +      | <u>TTGACAACAAATAAACCATGTAGTATAAT</u>   | 129202-129230 | 17     | -  | Orf183 |
| P26                 | +      | <u>TTGACAATAGTAAAGTAATAGGTTATAAT</u>   | 130829-130857 | 17     | -  | Orf187 |
| P27                 | +      | <u>TTGACATGGATAGAGTTTTACTATATACT</u>   | 131544-131572 | 17     | -  | Orf188 |
| P28                 | +      | <u>TTGACAATCATGAAGCGGTATGTTATAAT</u>   | 133272-133300 | 17     | +  | Orf192 |
| P29*                | -      | <u>TTGACTTCTGAATAACTATACTGTAATAT</u>   | 137054-137082 | 17     | -  | Orf202 |
| P30                 | +      | <u>TTGACTTTATTATCATATGGTAGTAATAT</u>   | 137177-137205 | 17     | -  | Orf203 |
| P31                 | +      | <u>TTGACACCTTACAAGATACATGTTATTAT</u>   | 137687-137715 | 17     | +  | Orf204 |
| P32                 | -      | <u>TTGACATTAAGACCGAATTATTATATAAT</u>   | 139360-139388 | 17     | -  | Orf206 |
| P33                 | +      | <u>TTGACTTATGTTTATTTCTATAGTAATAT</u>   | 139434-139362 | 17     | -  | Orf207 |
| P34                 | +      | <u>TTGACAACCTATAAACAACGTGTTAATAT</u>   | 139655-139683 | 17     | +  | Orf208 |
| P35                 | +      | <u>TTGACAGTCACTTGAAACCATGATATTAT</u>   | 139969-139997 | 17     | +  | Orf209 |
| P36                 | +      | <u>TTGACTTCCAAGCCCTAGCATGTTATTAT</u>   | 140373-140401 | 17     | +  | Orf210 |
| P37                 | +      | <u>TTGACAACCTTCCAACATCATGTTATTAT</u>   | 141244-141272 | 17     | +  | Orf211 |
| P38                 | +      | <u>TTGACAAACTAACCCTTCATGATAATAT</u>    | 141728-141756 | 17     | +  | Orf212 |
| P39                 | +      | <u>TTGACATTTAGCCCCTTAGATGTTATTAT</u>   | 141972-142000 | 17     | +  | Orf213 |
| P40                 | +      | <u>TTGACATCCTAGCAAATAGATGGTAATAT</u>   | 142290-142318 | 17     | +  | Orf1   |
| <b>phiIPLA-C1C</b>  |        |                                        |               |        |    |        |
| P1*                 | +      | <u>TTGACAAAATAATAATATATGATATAAT</u>    | 372-399       | 16     | +  | Orf2   |
| P2                  | +      | <u>TTGACAACCATCAAGGGTTAAATTATAAT</u>   | 17452-17480   | 17     | -  | Orf21  |
| P3                  | +      | <u>TTGACAAACTAATAAAGAGAAGATATAAT</u>   | 18306-18334   | 17     | -  | Orf24  |
| P4                  | +      | <u>TTGACTTATTAAGGTTAAGTGGTATAAT</u>    | 53130-53158   | 17     | +  | Orf49  |
| P5                  | +      | <u>TTGACTTATCAAAAGTTAAGTGGTATAAT</u>   | 55110-55138   | 17     | +  | Orf52  |
| P6*                 | +      | <u>TTGACAAACTATATCTATTTATGATATAGT</u>  | 71274-71303   | 18     | +  | Orf71  |
| P7*                 | +      | <u>TTGACAAATATATACATATATGTTATAGT</u>   | 77949-77975   | 17     | +  | Orf80  |
| P8*                 | +      | <u>TTGACAAAAAGTTATTATAGTTTATAGT</u>    | 89480-89508   | 17     | -  | Orf100 |
| P9                  | +      | <u>TTGACAGGGGTCTTTTTTTTATGTTATAGT</u>  | 93681-93710   | 18     | +  | Orf105 |

|      |   |                                         |               |    |   |        |
|------|---|-----------------------------------------|---------------|----|---|--------|
| P10  | + | <u>TTGACACTGGGTGTTTTTGTATATACT</u>      | 95823-95851   | 17 | - | Orf109 |
| P11  | + | <u>TTGACA</u> ACTGTATAAAATATAGTGTATATT  | 104207-104235 | 17 | - | Orf132 |
| P12  | - | <u>TTGACAGGAGGTCTTTTCTATGATATACT</u>    | 108967-108995 | 17 | + | Orf141 |
| P13  | - | <u>TTGACA</u> ACTAATATTACTTATGCTATAAT   | 109378-109406 | 17 | + | Orf142 |
| P14* | - | <u>TTGACTATTGCTTTTTAATGCAGATTAATAT</u>  | 112897-112927 | 19 | - | Orf148 |
| P15  | + | <u>TTGACACCTTATAAGAAACATGTTAATAT</u>    | 113600-113628 | 17 | + | Orf150 |
| P16  | + | <u>TTGACA</u> ATATTATATTTAAAAATGCTATAAT | 114425-114454 | 18 | + | Orf152 |
| P17  | + | <u>TTGACA</u> ACTTAAACACAACATGTTATTAT   | 115114-115142 | 17 | + | Orf153 |
| P18  | + | <u>TTGACA</u> ATCAACCCCTACACATGTTATTAT  | 115333-115362 | 18 | + | Orf154 |
| P19  | + | <u>TTGACA</u> ATCTCTTCACTATTTGATATTAT   | 115788-115816 | 17 | + | Orf156 |
| P20  | + | <u>TTGACAGTAATTTGAAACTATGATAATAT</u>    | 116298-116326 | 17 | + | Orf157 |
| P21  | + | <u>TTGACA</u> ACGTAAC TAGAACATGATATTAT  | 116730-116758 | 17 | + | Orf158 |
| P22  | + | <u>TTGACAGTTTCTATGTTATAATGTTATAAT</u>   | 117850-117879 | 18 | + | Orf161 |
| P23  | - | <u>TTGACAGATAAAAGTTATCTATGGTATACT</u>   | 122302-122330 | 17 | + | Orf167 |
| P24  | - | <u>TTGACA</u> AAAAATGAATAGCTATGGTATACT  | 127601-127629 | 17 | + | Orf178 |
| P25  | - | <u>TTGACA</u> ACTTAAAGTAGTAAATGTTATAAT  | 127855-127883 | 17 | + | Orf179 |
| P26  | - | <u>TTGACTTTTAAGTTTATATGTGTTATAAT</u>    | 134125-134153 | 17 | + | Orf193 |
| P27  | - | <u>TTGACATTTATCAAAAATAAGATTATAAT</u>    | 138211-138239 | 17 | + | Orf197 |

**Table S3:** Putative promoters of phages phiIPLA-RODI and phiIPLA-C1C. -10 and -35 boxes are underlined. Nucleotide positions and presence of the TG dinucleotide were also indicated. \* Promoters without AT-rich upstream sequences.

| Terminator         | Strand | Sequence (5'-3')                                                 | Nt position   | Stem length | ΔG    | After gene |
|--------------------|--------|------------------------------------------------------------------|---------------|-------------|-------|------------|
| <b>phiPLA-RODI</b> |        |                                                                  |               |             |       |            |
| T1                 | +      | GUUUAGACUAAGAGGGAAUAAAAUCCCUCUUUUUAUUUUUAU                       | 1304-1344     | 18          | -9.8  | Orf4       |
| T2                 | -      | UGAACUAGUUGGAGGGGAGUUAACUCCUCUCUUUUUUUUUU                        | 1608-1649     | 19          | -8.4  | Orf5       |
| T3                 | -      | UUAAAUGAUAAACACCUAUUAAAUUAAUAGGUGUUUUUUUAUUGACU                  | 6932-6978     | 23          | -8.6  | Orf17      |
| T4                 | -      | AUUAAUUCUUAGGCUACUUUAAUUAGUAGCCUUUUUUUGUUGA                      | 11405-11447   | 20          | -11.2 | Orf26      |
| T5                 | -      | UAGGUACAGAAGCAGACUUUAAUAAGUCUGCUUUUCUCUUAUUAU                    | 12171-12215   | 21          | -11.8 | Orf28      |
| T6                 | -      | CUUUCUUUUUCACCUUGCUUGUAUCCAAGCAGGGUGUUUUUUUAUUA                  | 16604-16652   | 26          | -11.7 | Orf36      |
| T7                 | -      | AUAUUGACAAAACCUCUUAGUUAUGGUAUACUUAUUAAUAACUAAGGAGGaUUUUUUUAUGAAU | 22282-22349   | 43          | -10.6 | Orf46      |
| T8                 | -      | UAAUAUAUUAAGACUAAGAUAUUUUCUUAGUCUUUUUUGUAUAU                     | 25564-25609   | 22          | -10.5 | Orf53      |
| T9                 | -      | AAUAAUAAAUUAGAGAGGUUAAUACCUCUCUUUUUUUUGUCUUUA                    | 26457-26501   | 20          | -11.6 | Orf54      |
| T10                | -      | AAUAGUAAUUUAGACGGAUUUUAAAUCCGUCUaUUUUUUUGCAA                     | 27666-27711   | 21          | -11   | Orf56      |
| T11                | +      | AUAAAACUGAAGAGGAGUAUUACUCCUCUUUUUUUGUUUGC                        | 40917-40957   | 18          | -10.8 | Orf72      |
| T12                | +      | AUUAAUAAUAAGCCUAGAUAUAAUCUAGGCUUUGUUUAUUUUUU                     | 43443-43487   | 21          | -11.3 | Orf75      |
| T13                | +      | ACAAGAGAAUAGGGAUAAACUUAGGGUUUAUCCCUUUUUUAUUAAAA                  | 46911-46957   | 23          | -10.2 | Orf78      |
| T14                | +      | UUUCUUAUUAAGACCUAACAUAUAAAAGUUAGGUCUUUUUUUAUUGA                  | 53676-53721   | 23          | -11.4 | Orf86      |
| T15                | +      | GUUAUUGUAAAGGGUGGUAGGGUAUACUACCAUCCUUAUUUUUUUA                   | 57242-57288   | 24          | -12.1 | Orf93      |
| T16                | +      | UUUAAUAUUAAGACCUAUUAAUUUAGGUCUUUUUUUAGUUGUA                      | 67310-67353   | 20          | -9    | Orf97      |
| T17                | +      | UGAAUAAACUAGAGGGGUUGAUUGACCCUCUUUAUUUAUAA                        | 77692-77734   | 20          | -14.4 | Orf104     |
| T18                | +      | AAUUGCCAUAAGACUAGGAAACUUAUCCUAGUCUUUUUUUCUUGA                    | 81590-81634   | 22          | -12.1 | Orf108     |
| T19                | +      | GACUAAUGAAGAAGAGAAUAAUUCUCUUCUUUUUUUAUUGACA                      | 98795-98839   | 20          | -9.3  | Orf127     |
| T20                | +      | UAUAAGAUAUAGAGUGCCUUAAGAGCACUCUUUUUAUUUGAGA                      | 104276-104316 | 18          | -9.2  | Orf131     |
| T21                | +      | GUAAAAGAAUCUUUGGGGAAUGCAAUUCUCAGAUUGUUCUCCUU                     | 105633-105679 | 24          | -8.2  | Orf132     |
| T22                | +      | AUAAUAAUUAAGACCAACUAAAAAGUUGGUCUUUUUUUAUUGA                      | 108136-108178 | 20          | -11.5 | Orf137     |
| T23                | +      | GAUUUCUUUAUAGAGUCAAGUCUUUACUUGACUCUUUUUACUAUAU                   | 111166-111210 | 22          | -12.1 | Orf142     |
| T24                | +      | GAACAGUGAUUGAGUCAAGUUAUUCUUGACUCUCUUUUUGUUUU                     | 117159-117203 | 22          | -11.5 | Orf151     |
| T25                | +      | AUAAAUCUUAACUCCCUAUUGACAAGGGAGUUUUUUUAUUGUAUA                    | 126538-126583 | 22          | -10.2 | Orf174     |
| T26                | +      | AAAAACUUUGACUCUAUCUAUUGACAUGGAUAGAGUUUUACUAUAUA                  | 131524-131570 | 24          | -9.5  | Orf187     |
| T27                | +      | AAAAUAAAUACACUAGGAUAUUUUAUCCUAGUGUAUUUAUAAAU                     | 136582-136626 | 22          | -12.3 | Orf201     |
| T28                | -      | AAUUAUAUAAUACACUAGGAUAAUAUCCUAGUGUaUUUAUUUUUGCGG                 | 136578-136626 | 24          | -12.2 | Orf202     |
| T29                | +      | AAUUAUACAAUCCCUAGGAUUAUUUCCUAGGGAUUUUUAUUUGUU                    | 138352-138398 | 24          | -14.6 | Orf205     |
| T30                | -      | ACAAAUAAAAUCCCUAGGAUUUUUUAUCCUAGGGAaUUGUAUAAUUUU                 | 138349-138397 | 24          | -14.9 | Orf206     |
| T31                | +      | AAAAUUAAAAUAGGGGUUGACAUUUAGCCCUUaUGUUAUUUAUUA                    | 141954-142003 | 25          | -11.5 | Orf213     |
| T32                | +      | AUAAAUCUUAACUCCCUAUUGACAAGGGAGUUUUUUUAUUGUAUA                    | 126538-126583 | 22          | -10.2 | Orf174     |

|                   |   |                                                                            |               |    |       |        |
|-------------------|---|----------------------------------------------------------------------------|---------------|----|-------|--------|
| T33               | + | AAAAACUUUGACUCUAUCUAUUGACAUGGAUAGAGUUUUACUAUAUA                            | 131524-131570 | 24 | -9.5  | Orf187 |
| T34               | + | AAAAAUAAAUACACUAGGAUAUUU <u>UCCUAGUGUAUUUAUAAUU</u>                        | 136582-136626 | 22 | -12.3 | Orf201 |
| T35               | - | AAUUAUAUUAAUACACUAGGAAUAAU <u>UCCUAGUGUaUUUAUUUUUGCGG</u>                  | 136578-136626 | 24 | -12.2 | Orf202 |
| T36               | + | AAUUAUACA <u>AUCCCUAGGAUUAAUCCUAGGGAUUUUUAUUUGUU</u>                       | 138352-138398 | 24 | -14.6 | Orf205 |
| T37               | - | ACAAAUAAAAUCCCUAGGAAUUU <u>AAUCCUAGGGAaUUGUAUAAUUUUU</u>                   | 138349-138397 | 24 | -14.9 | Orf206 |
| T38               | + | AAAAAUUAAAAUAAGGGGUUGACA <u>UUUAGCCCCUUAgaUGUUAUUAAUUAA</u>                | 141954-142003 | 25 | -11.5 | Orf213 |
| T39               | + | AUAAAUCUUA <u>AAACUCCCUAUUGACA</u> AAAGGGAGUUUUUAUUGUAUA                   | 126538-126583 | 22 | -10.2 | Orf174 |
| T40               | + | AAAAACUUUGACUCUAUCUAUUGACAUGGAUAGAGUUUUACUAUAUA                            | 131524-131570 | 24 | -9.5  | Orf187 |
| T41               | + | AAAAAUAAAUACACUAGGAUAUUU <u>UCCUAGUGUAUUUAUAAUU</u>                        | 136582-136626 | 22 | -12.3 | Orf201 |
| T42               | - | AAUUAUAUUAAUACACUAGGAAUAAU <u>UCCUAGUGUaUUUAUUUUUGCGG</u>                  | 136578-136626 | 24 | -12.2 | Orf202 |
| T43               | + | AAUUAUACA <u>AUCCCUAGGAUUAAUCCUAGGGAUUUUUAUUUGUU</u>                       | 138352-138398 | 24 | -14.6 | Orf205 |
| T44               | - | ACAAAUAAAAUCCCUAGGAAUUU <u>AAUCCUAGGGAaUUGUAUAAUUUUU</u>                   | 138349-138397 | 24 | -14.9 | Orf206 |
| T45               | + | AAAAAUUAAAAUAAGGGGUUGACA <u>UUUAGCCCCUUAgaUGUUAUUAAUUAA</u>                | 141954-142003 | 25 | -11.5 | Orf213 |
| T46               | + | AUAAAUCUUA <u>AAACUCCCUAUUGACA</u> AAAGGGAGUUUUUAUUGUAUA                   | 126538-126583 | 22 | -10.2 | Orf174 |
| T47               | + | AAAAACUUUGACUCUAUCUAUUGACAUGGAUAGAGUUUUACUAUAUA                            | 131524-131570 | 24 | -9.5  | Orf187 |
| T48               | + | AAAAAUAAAUACACUAGGAUAUUU <u>UCCUAGUGUAUUUAUAAUU</u>                        | 136582-136626 | 22 | -12.3 | Orf201 |
| T49               | - | AAUUAUAUUAAUACACUAGGAAUAAU <u>UCCUAGUGUaUUUAUUUUUGCGG</u>                  | 136578-136626 | 24 | -12.2 | Orf202 |
| T50               | + | AAUUAUACA <u>AUCCCUAGGAUUAAUCCUAGGGAUUUUUAUUUGUU</u>                       | 138352-138398 | 24 | -14.6 | Orf205 |
| T51               | - | ACAAAUAAAAUCCCUAGGAAUUU <u>AAUCCUAGGGAaUUGUAUAAUUUUU</u>                   | 138349-138397 | 24 | -14.9 | Orf206 |
| T52               | + | AAAAAUUAAAAUAAGGGGUUGACA <u>UUUAGCCCCUUAgaUGUUAUUAAUUAA</u>                | 141954-142003 | 25 | -11.5 | Orf213 |
| <b>phiPLA-C1C</b> |   |                                                                            |               |    |       |        |
| T1                | + | UAAGUAAUUUAAGGGUAGAU <u>AUACUACCCUUUUUUUGCAUGUUAU</u>                      | 3632-3676     | 21 | -10.6 | Orf5   |
| T2                | + | AAAAUUUUUAUAGAGGGUAAAC <u>UUUGUUUAUCCUCUUUUUUUAUUAU</u>                    | 9623-9668     | 23 | -8.7  | Orf11  |
| T3                | + | UUCUAAGUAAAUAGACCAGGAUUAAU <u>UCUUGGUCUAUUUAACUUGACA</u>                   | 16407-16455   | 26 | -9    | Orf19  |
| T4                | + | UUAAUACAAAACCUAUACUAUCUGUUAAU <u>AAUUAUGAAUAAUAAAUAGUAUAGGUUUUUUUACGUU</u> | 18696-18765   | 46 | -7.31 | Orf24  |
| T5                | + | UAUUAUGUAGGGUGGUAGGAUGUUACUACC <u>CCUUUUUUUAAGU</u>                        | 19728-19773   | 23 | -14.2 | Orf26  |
| T6                | + | GAGUUUAAUAAGGUGGUUUAA <u>AAACCACCUUUUAUACAUAU</u>                          | 25289-25329   | 18 | -10.1 | Orf30  |
| T7                | + | UUAAUUUAUAGGCGGUUUUAUACCGUC <u>UUUUUUUAUUAG</u>                            | 31717-31756   | 17 | -8.5  | Orf33  |
| T8                | + | UAUCUAUUUAAGACUAAGUUAAAACU <u>UAGUCUUUUUUUAUUUGCA</u>                      | 455639-45684  | 21 | -9.3  | Orf44  |
| T9                | + | AAAGACUUAGAGAGACAGAU <u>UUAAAAUUUGUCUCUUUUUUUAUUGA</u>                     | 66853-66899   | 24 | -9.2  | Orf67  |
| T10               | + | AUUUAAUAAUAGAGUGCU <u>UAAGCACUCUUUUUAUUUGAUU</u>                           | 73137-73174   | 16 | -9.7  | Orf72  |
| T11               | + | ACCGCUUUUUAGACUAGGAUUAAU <u>UCCUAGUCUUUUUUUAUUUG</u>                       | 77907-77951   | 22 | -12.9 | Orf79  |
| T12               | + | AUUAAAGAAAAGUAGAGGCAU <u>UUUGCUUCUACUUUAUUUAUUG</u>                        | 80619-80663   | 22 | -11.9 | Orf83  |
| T13               | + | CUUUUUUAAGCAGUCGAUAC <u>UAAAAAGUAUUGACUGUUUUUUGCUUUU</u>                   | 87110-87158   | 26 | -7.4  | Orf94  |
| T14               | + | AAUUUUUUACUGACCCCUA <u>UUGACAGGGGUCUUUUUUUUUAUGU</u>                       | 93662-93704   | 20 | -12.7 | Orf104 |



|     |   |                                                                              |               |    |       |        |
|-----|---|------------------------------------------------------------------------------|---------------|----|-------|--------|
| T15 | + | UAAAUUAUAAAAACACCCU <u>UGACAC</u> UGGGUGUUUUUUUGUUAUAUAC                     | 95805-95849   | 22 | -10.3 | Orf108 |
| T16 | + | GAUGAAAUGGGGGAGUAGGGAAACUACUCCUUUUUUUAUUUA                                   | 101395-101437 | 20 | -15   | Orf123 |
| T17 | - | AAUAGUUGAGUACCGCUUCAGUAAU <u>AUAGA</u> AGCGGU <sub>a</sub> UUUUUUUUUGUUU     | 108276-108325 | 25 | -12.2 | Orf140 |
| T18 | - | AAUAAUUACUAGACCUCU <u>UGAC</u> AGGAGGUCUUUUUCUAUGAUAU                        | 108970-109012 | 19 | -10.3 | Orf142 |
| T19 | + | UAUAAUAAACAAACCGCUUCAGAUUAA <u>UUUC</u> CGAAGCGGU <sub>c</sub> UUAUUUUUUUAGG | 111294-111347 | 29 | -11.3 | Orf146 |
| T20 | - | AUAUCAAUUAGACUAGGGUUU <u>UCCCU</u> AGUCUUUUUAUGUUCUA                         | 112122-112165 | 20 | -14   | Orf147 |
| T21 | + | UAAUUUAAAAUUAGGGGUUGCAAUC <u>AAAACCCCU</u> AUUUGCUAUAUA                      | 113490-113536 | 24 | -12.5 | Orf149 |
| T22 | + | AAUAAUAAUAAAGCCUAGGAUUAA <u>AUCCU</u> AGGUUUUUUUUUUUUUUU                     | 114326-114371 | 22 | -12.6 | Orf151 |
| T23 | + | GUAAGAGAGUACA <u>AAAGGGGAA</u> UAAUCCCUUUGUAUUUUUUUGUU                       | 118166-118210 | 22 | -10.1 | Orf161 |
| T24 | + | AUAUUUUAAAAAGCAAGAGAU <u>AAAAAC</u> UCUUGCUUUUAUUUAUAUAGA                    | 119932-119979 | 23 | -10.2 | Orf162 |
| T25 | - | AAAGAUUUAAAAGACUAGUUACA <u>AAACU</u> AGUCUUUUUUUAUUUAUA                      | 122332-122376 | 21 | -9    | Orf168 |
| T26 | - | AAUAAUUACUAGGACUAGGAUUAA <u>AUCCU</u> AGUCCUUAUUUUUUUAGG                     | 122731-122777 | 23 | -14.3 | Orf169 |
| T27 | - | AUUAGUAAUAAACAAGGGAUAA <u>AAACCCU</u> UGUUUAUUUUUUUUAC                       | 125421-125464 | 20 | -9.5  | Orf174 |
| T28 | - | UCUUCCUUUUCCCUUAUUACUUU <u>UGU</u> AGUAAGGGUUUUUAUUUAUA                      | 127155-127201 | 24 | -8.5  | Orf178 |
| T29 | - | ACUAAUACUACAGAAGAACUUU <u>AAAAAG</u> UUCUUCUUUUUUUUUAUUGACA                  | 127878-127926 | 24 | -9    | Orf180 |
| T30 | - | AUUUAUUUUUAGACUAGGAUUAA <u>AUCCU</u> AGUCUUUUUUUAUUGA                        | 134211-134255 | 22 | -12.9 | Orf194 |
| T31 | - | AUAUAGAAUAACCACCUAUUU <u>AUGU</u> AGGGUUUUUCUUAUAUU                          | 136347-136389 | 20 | -12   | Orf196 |
| T33 | - | GAAUUAUUAAAGGCUAACU <u>UAUG</u> UUAGUCUUUUUUUAUAUA                           | 138593-138633 | 18 | -8.3  | Orf198 |

**Table S4:** Putative terminators of phages phiIPLA-RODI and phiIPLA-C1C. The underline sequence corresponds to the terminator stem.

Lowercase letter in RNA motifs indicates the spacer element between the stem-loop and T-rich region.
